# Supplementary material for: Comparative effectiveness of treatments to prevent dental caries given to rural children in school-based settings: protocol for a cluster randomised controlled trial
Source: PubMed Central journal article supplement — BMJ Open. 2018 Apr 13;8(4):e022646. doi: 10.1136/bmjopen-2018-022646 (PMC5905731; doi:10.1136/bmjopen-2018-022646), 2018-04-13
Supplement: bmjopen-2018-022646.draft_revisions.pdf [file bmjopen-2018-022646.draft_revisions.pdf]

# BMJ Open

BMJ Open is committed to open peer review. As part of this commitment we make the peer review history of every article we publish publicly available.

When an article is published we post the peer reviewers' comments and the authors' responses online. We also post the versions of the paper that were used during peer review. These are the versions that the peer review comments apply to.

The versions of the paper that follow are the versions that were submitted during the peer review process. They are not the versions of record or the final published versions. They should not be cited or distributed as the published version of this manuscript.

BMJ Open is an open access journal and the full, final, typeset and author-corrected version of record of the manuscript is available on our site with no access controls, subscription charges or pay-per-view fees (<http://bmjopen.bmj.com>).

If you have any questions on BMJ Open's open peer review process please email [info.bmjopen@bmj.com](mailto:info.bmjopen@bmj.com)

# BMJ Open

## Comparative effectiveness of treatments to prevent dental caries given to rural children in school-based settings: protocol for a cluster randomized controlled trial

|                               |                                                                                                                                                                                                                                           |
|-------------------------------|-------------------------------------------------------------------------------------------------------------------------------------------------------------------------------------------------------------------------------------------|
| Journal:                      | <i>BMJ Open</i>                                                                                                                                                                                                                           |
| Manuscript ID                 | bmjopen-2018-022646                                                                                                                                                                                                                       |
| Article Type:                 | Protocol                                                                                                                                                                                                                                  |
| Date Submitted by the Author: | 13-Mar-2018                                                                                                                                                                                                                               |
| Complete List of Authors:     | Ruff, Ryan; New York University College of Dentistry, Epidemiology & Health Promotion; New York University College of Global Public Health, Niederman, Richard; New York University College of Dentistry, Epidemiology & Health Promotion |
| Keywords:                     | PREVENTIVE MEDICINE, ORAL MEDICINE, EPIDEMIOLOGY                                                                                                                                                                                          |
|                               |                                                                                                                                                                                                                                           |

SCHOLARONE™  
Manuscripts

Peer Review Only

1  
2  
3  
4  
5  
6  
7  
8 **Comparative effectiveness of treatments to prevent dental caries**  
9 **given to rural children in school-based settings: protocol for a cluster**  
10 **randomized controlled trial**  
11  
12

13 Ryan Richard Ruff<sup>1,2</sup> and Richard Niederman<sup>1</sup>  
14

- 15  
16 1. *Department of Epidemiology & Health Promotion, New York University College of Dentistry*  
17 2. *New York University College of Global Public Health*  
18

19 Correspondence to:  
20 Ryan Richard Ruff, MPH, PhD  
21 NYU College of Dentistry  
22 433 First Avenue, Room 712  
23 New York, NY, 10010  
24 Tel: 212-998-9663  
25 E-mail: [ryan.ruff@nyu.edu](mailto:ryan.ruff@nyu.edu)  
26  
27

28 Running title: Comparative effectiveness  
29

30 Total number of pages, figures, and supplementary tables: 19  
31

32 Submitted to: Trials  
33 Date: 2/27/18  
34  
35  
36  
37

38 Abstract word count: 258  
39 Manuscript word count: 2891  
40 Figures: 1  
41 Tables: 0  
42  
43  
44  
45  
46  
47  
48  
49  
50  
51  
52  
53  
54  
55  
56  
57  
58  
59  
60

## Abstract

**Introduction:** Dental caries is the most prevalent childhood disease in the world and can lead to infection, pain, and reduced quality of life. Multiple prevention agents are available to arrest and prevent dental caries; however little is known of the comparative effectiveness of combined treatments when applied in pragmatic settings. The aim of the presented study is to compare the benefit of silver diamine fluoride and fluoride varnish versus fluoride varnish and glass ionomer therapeutic sealants in the arrest and prevention of dental caries.

**Methods and Analysis:** A longitudinal, pragmatic, cluster randomized, single-blind, non-inferiority trial will be conducted in low-income rural children enrolled in public elementary schools in New Hampshire, United States, from 2018-2023. The primary objective is to compare the non-inferiority of alternative agents in the arrest and prevention of dental caries. The secondary objective is to compare cost-effectiveness of both interventions. Caries arrest will be evaluated after two years, and caries prevention will be assessed at the completion of the study. Data analysis will follow intent to treat, and statistical analyses will be conducted using a significance level of 0.05.

**Ethics and Dissemination:** The standard of care for dental caries is office-based surgery, which presents multiple barriers to care including cost, fear, and geographic isolation. The common intervention used in school-based caries prevention is dental sealants. The simplicity and affordability of silver diamine fluoride may be a viable alternative for the prevention of dental caries in high-risk children. Results can be used to inform policy for best practices in school-based oral health care.

**Trial registration:** NCT03448107, registered on 2/26/18

**Keywords:** dental caries; caries arrest; caries prevention; silver diamine fluoride; sealants; interim therapeutic restorations

### Strengths and limitations of this study

- Study is a cluster randomized non-inferiority trial
- Study will compare simple and complex interventions for the treatment and prevention of dental caries measured using standard clinical diagnostic criteria
- Statistical and economic analysis will utilize multilevel modeling, generalized additive modeling, and Markov modeling
- Interventions will be randomly assigned at the school level; any child within each participating school that provides informed consent and assent will receive care twice yearly

## Background

Dental caries (tooth decay), a gram positive, aerophilic bacterial infection, is the most prevalent childhood disease in the world, estimated to cause a loss of 3.5 million disability adjusted life years<sup>1,2</sup>. If left untreated, dental caries can lead to acute abscess, sepsis, and in rare circumstances, systemic infection and death<sup>3-5</sup>. Untreated dental caries affects more than 20% of elementary school-aged children in the United States, and over 50% of children have ever experienced caries. Among low-income minority children, caries experience can be greater than 70%, and the prevalence of untreated caries exceeds 30%<sup>6-8</sup>. Though the overall prevalence of caries has reduced over the past ten years, sealant use is lowest among low-income children, and less than half of children from low-income families reported visiting a dentist in the previous year<sup>8-10</sup>.

The standard of care for dental caries is office-based surgery consisting of local anesthesia, removal of decay using a dental drill, etching of the tooth with acidic gel, application of an amalgam, composite resin, ionomer, gold, or ceramic material, hardening, and polishing<sup>11</sup>. However, office-based care presents multiple access barriers to patients including cost, fear, and geographic isolation<sup>12</sup>. Fewer than 15% of children who accessed an office-based dentist received preventive care<sup>13</sup>, many children do not have access to prevention services<sup>14</sup>, and those with the least access to prevention have a higher prevalence of oral disease<sup>14</sup>. As a result, many federal and state organizations and institutions recommend the proactive prevention of caries as an alternative to reactive treatment<sup>14-17</sup>. Caries prevention can be provided through traditional office-based care, mobile dental vans, or as part of a school-based dental program, and the comparative effectiveness of these prevention models has been identified as one of the highest-priority research questions by the Institute of Medicine<sup>18</sup>.

Common caries prevention agents include water fluoridation, fluoride toothpaste, fluoride varnish, sealants, interim therapeutic restorations or atraumatic restorations, and silver diamine fluoride

1  
2  
3 (SDF). Individually, each of these preventive treatments has been shown in randomized clinical trials and  
4  
5 systematic reviews to be efficacious in the prevention or treatment of dental caries. A review of thirteen  
6  
7 trials in children and adolescents found that those treated with fluoride varnish experienced an average  
8  
9 reduction of decayed, missing, or filled tooth surfaces of 43% when compared to untreated youth<sup>19</sup>. A  
10  
11 systematic review of six trials showed that resin-based sealants significantly reduced the risk of caries in  
12  
13 permanent molars up to 48 months compared to no sealants, and estimated that if 70% of control  
14  
15 unsealed tooth surfaces were decayed, application of a resin-based sealant would significantly reduce  
16  
17 the proportion of carious surfaces to under 19%<sup>20</sup>. Further, there was not sufficient evidence in both  
18  
19 systematic reviews and meta-analyses to suggest the superiority of the preventive effects of either  
20  
21 resin-based or glass-ionomer sealant material<sup>20,21</sup>. A 2012 meta-analysis of 29 studies indicated that pits  
22  
23 and fissures of teeth sealed with interim therapeutic restorations had a mean annual caries incidence  
24  
25 over three years of only one percent<sup>22</sup>. Finally, silver diamine fluoride has been shown in reviews to  
26  
27 have higher preventive fractions of arrested and prevented caries than fluoride varnish<sup>23</sup>, and SDF at  
28  
29 38% concentration applied biannually was more effective in preventing caries than annual applications  
30  
31 of lower concentrations<sup>24</sup>.  
32  
33  
34  
35  
36

37  
38 Despite this evidence, the combined effectiveness of different treatments, as well as their  
39  
40 feasibility for use in pragmatic settings, is unknown. The objectives of the presented longitudinal,  
41  
42 pragmatic, cluster randomized, single-blind, non-inferiority trial are to compare the clinical and cost  
43  
44 effectiveness of a simple prevention package (consisting of fluoride varnish and SDF) versus a complex  
45  
46 prevention package (consisting of fluoride varnish and therapeutic sealants) in the arrest and prevention  
47  
48 of dental caries among low-income rural children in primary school settings. It is hypothesized that  
49  
50 simple caries prevention is non-inferior to complex care and is more cost-effective for large-scale  
51  
52 implementation.  
53  
54  
55  
56  
57  
58  
59  
60

## Methods/Design

This is a longitudinal, pragmatic, cluster randomized, single-blind, non-inferiority clinical trial comparing silver diamine fluoride with fluoride varnish versus therapeutic sealants with fluoride varnish given biannually to children enrolled in public elementary schools in New Hampshire. Prior to the study start, participating schools meeting inclusion criteria will be randomly assigned to receive fluoride varnish/SDF or fluoride varnish/sealants in six-month intervals ( $\pm 1$  month). At each observational period, study participants with informed consent will receive a comprehensive oral examination provided by a licensed dental hygienist (Figure 1)<sup>25,26</sup>. The clinical examination will include an assessment of every tooth and tooth surface for decayed, filled, or missing teeth, as well as pulpal involvement or abscess. Following the oral evaluation, participants will receive the assigned treatments. Any participant presenting with a medical emergency will be referred to school nurses for follow-up care.

This trial protocol is reported following the Standard Protocol Items: Recommendations for Interventional Trials (SPIRIT) guidelines and has received approval from the New York University School of Medicine Institutional Review Board (#i17-01221). Any changes to the study protocol will be communicated to the IRB and funder in quarterly reports, and investigators will cooperate with any independent audit on behalf of the IRB or funding organization. The study was registered at [www.clinicaltrials.gov](http://www.clinicaltrials.gov) (#NCT03448107).

### **Treatment description and regimen**

*Simple Prevention.* One drop (0.05 ml) of silver diamine fluoride (Advantage Arrest<sup>TM</sup>) solution at 38% concentration (2.24 F-ion mg/dose) will be dispensed per child. Posterior tooth surfaces to be treated will be dried, after which the SDF will be applied with a microbrush to all asymptomatic carious lesions and to all pits and fissures on bicuspid and molar teeth for thirty seconds. Fluoride varnish (5%



1  
2  
3 NaF) will then be applied to all teeth. Simple prevention will be provided by either dental hygienists or  
4  
5 registered nurses.  
6  
7

8 *Complex Prevention.* All primary and permanent teeth will be dried prior to application. Pits and  
9  
10 fissures on all bicuspid and molar teeth will be sealed with glass ionomer sealants (GC Fuji IX). Glass  
11  
12 ionomer sealants (interim therapeutic restorations) will also be placed on all asymptomatic carious  
13  
14 lesions. Fluoride varnish (5% NaF) will then be applied to all teeth. Complex prevention will be provided  
15  
16 by dental hygienists.  
17  
18

19  
20 Both arms will also receive toothbrushes, fluoride toothpaste, and oral hygiene instruction.  
21  
22 Clinical care will be provided in a dedicated room in each school using mobile equipment and disposable  
23  
24 supplies.  
25  
26

### 27 28 ***Risks and Adverse Events*** 29

30  
31 Each intervention used in this trial is currently employed in clinical practice as a standard of care  
32  
33 procedure. The potential risks for study participants are minimal and identical to the risk for children  
34  
35 obtaining care in a dental office. The greatest risk is an allergic reaction to fluoride varnish, silver  
36  
37 diamine fluoride, or glass ionomer. All adverse events occurring during the study period will be  
38  
39 recorded: at each contact with the study participant, investigators will seek information on adverse  
40  
41 events by specific questions and an oral examination. Evidence of adverse events will be recorded on  
42  
43 electronic health records and appropriate case report forms. The clinical course of each event will be  
44  
45 followed until resolution, stabilization, or until it has been determined that participation in the study  
46  
47 was not the cause. Serious adverse events ongoing at study end will be followed to determine the final  
48  
49 outcome. Adverse event reports will be reported to the IRB within five working days from the time  
50  
51 investigators become aware of the event.  
52  
53  
54  
55  
56  
57  
58  
59  
60

### **Definition of outcome measures**

*Primary outcome measures.* Primary outcomes include clinically-evaluated caries arrest and the prevention of new caries. Caries arrest will be evaluated after two years and the prevalence of new caries will be evaluated after five years.

*Secondary outcome measures.* Secondary outcomes include the comparative cost effectiveness of simple versus complex prevention in the arrest and prevention of dental caries.

### **Recruitment & Eligibility**

In collaboration with the New Hampshire Department of Health and Human Services (DHHS), study investigators identified extant school-based caries prevention programs currently operating in rural counties in New Hampshire. Program officials were contacted to solicit interest in participating in the proposed study. Program officials, in turn, contacted school principals to determine interest in participation. Each participating program and school has confirmed written consent for the study.

*Inclusion Criteria.* Any existing caries prevention program operating in rural (defined using criteria from the U.S. Department of Agriculture) areas, with official Title 1 status, and located in a health professional shortage area was eligible to participate. All schools within eligible programs were eligible to participate.

### **Randomization**

Participating schools will be block randomized at the school level to receive either the simple or complex treatment using a random number generator. Study statisticians will generate random numbers and assign schools to each number sequence.

### **Blinding**

1  
2  
3 Due to the nature of the treatments provided, dental hygienists providing care will not be  
4 independent from study protocols and therefore are not blinded. Assignment to treatments will follow a  
5 predetermined randomization list at the school level, and all students with consent in participating  
6 schools will receive the assigned treatment. However, all data analyses for caries arrest will be blinded,  
7 as data will be masked prior to analysis such that which schools were assigned to each treatment cannot  
8 be determined. Following analysis of caries arrest, blinding can no longer be guaranteed.  
9  
10  
11  
12  
13  
14  
15

### 16 17 ***Data collection, transmission, and storage*** 18

19  
20 Prior to the beginning of each school year, electronic rosters for each participating school will be  
21 provided to study investigators from the DHHS, which will include a unique student identifier,  
22 demographic variables, and any available Medicaid identification. School rosters will be used to  
23 electronically create personalized informed consent forms for every student in the school, which will  
24 then be combined with a letter from the principal explaining the study and distributed to parents of  
25 children in each school. Completed informed consent will be collected at the school by study  
26 investigators. Schools will be recruited in the first year of the study. Children within schools will be  
27 enrolled in each year of the program to accommodate newly registered students each academic year.  
28 Recruitment for this study is pending.  
29  
30  
31  
32  
33  
34  
35  
36  
37  
38  
39  
40

41 Data collected from each participant will be recorded on a password-protected tablet computer  
42 using a propriety software system that is pre-populated with the demographic information of the  
43 participant from previously obtained DHHS records. Data collectors will be standardized and calibrated  
44 prior to study start. Following each data collection day of the study, electronic records will be uploaded  
45 to a secure server and stored at the Boston University Data Coordinating Center (DCC) and evaluated for  
46 quality assurance. Prior to the transmission of data from the DCC to investigators, identifying  
47  
48  
49  
50  
51  
52  
53  
54  
55  
56  
57  
58  
59  
60

1  
2  
3 information will be removed and replaced with a unique, anonymized student identifier. This data will  
4  
5 be kept at the New York University College of Dentistry on a secure, password-protected server.  
6  
7

### 8 ***Patient and Public Involvement***

10  
11 Planning for this study began over five years ago with pilot studies and meetings with  
12  
13 community stakeholders. Stakeholders included representatives from the New Hampshire DHHS  
14  
15 Medicaid and Oral Health offices, state dental societies and insurers, community health centers, and a  
16  
17 local hospital. The study design was thus informed by stakeholder priorities and preferences, including  
18  
19 development of protocols, selection and burden of interventions, training for hygienists, and planned  
20  
21 implementation. The design was further created with input from parents of pilot study patients who  
22  
23 were participants in group discussions regarding prevention protocols. However, patients themselves  
24  
25 were not directly involved.  
26  
27  
28  
29

30 For this study, parents will be participants in that they will sign informed consent documents.  
31  
32 Parents of participating children will also participate in group quarterly and annual meetings. While  
33  
34 direct study results will not be disseminated to participants, children will receive a personalized take  
35  
36 home message after each clinical visit that summarizes the care they received and the care still needed.  
37  
38 Formal study results will be disseminated to community stakeholders.  
39  
40  
41

### 42 ***Sample size calculation***

44  
45 The study is powered for the primary outcomes of caries arrest and prevention. Power  
46  
47 calculation for caries arrest assumes a clustered two-group comparison of simple versus complex  
48  
49 prevention for a non-inferiority trial. Estimates assume an overall participation rate of 35% across each  
50  
51 of the two groups, yielding a total enrollment of 3,926 students within 43 schools. Previous studies of  
52  
53 school-based caries prevention in New Hampshire rural elementary schools indicated a baseline caries  
54  
55  
56  
57  
58  
59

1  
2  
3 prevalence between 30-40%. Assuming an equal allocation of untreated decay across groups of 20% and  
4  
5 alpha of 0.05, a total sample size of 198 participants per arm (N=396) would be required for a non-  
6  
7 inferiority margin ( $\delta$ ) of caries arrest at 10%, assuming 80% power. When adjusted for within-school  
8  
9 clustering ( $d_{eff} = 10$ ), a sample size of 3,960 is required.

10  
11  
12  
13 Power for longitudinal analyses of caries prevention was computed for the use of generalized  
14  
15 estimating equations<sup>27</sup>. Using the same expected enrollment of 3,926 students, estimates assume an  
16  
17 annual attrition rate of 20% and a natural increase in informed consent rates of 10% (which also includes  
18  
19 new students entering schools and enrolling in the study) per year. For 95% power, an alpha of 0.05, an  
20  
21 average of four observational periods (excluding baseline), a high correlation between repeated  
22  
23 observations ( $r = 0.6$ ), and a design effect of 20, a sample size of 1,961 students per arm is required to  
24  
25 detect a difference in untreated decay of 15% and 2,942 for a difference of 10%.

### 26 27 28 29 **Statistical Analysis**

30  
31  
32 For the non-inferiority of caries arrest, the per-patient proportion of carious lesions at baseline  
33  
34 treated with simple versus complex prevention that stayed arrested throughout the first two years of  
35  
36 observation will be determined. Any deciduous teeth with treated carious lesions that are lost due to  
37  
38 exfoliation will be considered as arrested throughout the lifetime of the tooth, with arrested caries  
39  
40 status being carried over throughout. Thus, tooth-level indicators are able to be present for both  
41  
42 primary and permanent dentitions at the same time. With this approach, each carious tooth treated  
43  
44 with either simple or comprehensive prevention is a single trial with outcomes either of arrested (1) or  
45  
46 failed to arrest (0). The percentage of arrested caries (at the child level) will thus be modeled using  
47  
48 multilevel binomial regression with a logit link  $Y_j \sim \text{Bin}(\pi_j)$ ,  $E(Y_j) = \pi_j$ ; where  $\pi_j$  is the probability of success.  
49  
50  
51 The noninferiority margin,  $\delta$ , is set at 10%. While there is no gold standard criterion for the selection of  
52  
53 this margin, the margin was set based on collaborative discussion with clinicians to determine what is  
54  
55  
56  
57  
58  
59  
60

1  
2  
3 considered as clinically unimportant. The null hypothesis is that the experimental treatment (simple  
4 prevention) is inferior to the standard treatment (complex prevention) by at least  $\delta$ :  $\pi_{\text{simple}} - \pi_{\text{complex}} \geq \delta$ .

5  
6  
7 The alternative hypothesis is that  $\pi_{\text{simple}} - \pi_{\text{complex}} < \delta$ .

8  
9  
10 Based on results from multilevel binomial models, differences in effect sizes estimated by  
11 confidence intervals will be used to determine clinical non-inferiority of the two prevention methods<sup>28</sup>.  
12  
13 Confidence intervals will be calculated for the difference between the two interventions, with the width  
14 of this interval signifying the extent of noninferiority. If the difference between the two interventions  
15 lies to the right of  $\delta$ , then noninferiority will be concluded. Though this method is preferred by  
16 reporting guidelines, p-values will also be reported, in keeping with other recommendations<sup>28</sup>.  
17  
18  
19  
20  
21  
22  
23  
24

25 For the prevention of new caries, longitudinal data will be analyzed using generalized estimating  
26 equations (GEE) and multilevel mixed effects regression models (ML-MEM) with the appropriate error  
27 distribution for the prevalence and incidence of untreated caries over time. The number of teeth at risk  
28 for each child during each follow-up interval will be identified and the number of those teeth in which  
29 new caries is observed at the examination that ends that interval will be determined. Primary teeth lost  
30 in each interval and new permanent teeth will not contribute to data for that interval. Data from  
31 baseline visits will be omitted from analyses and used as an indicator of any untreated decay at baseline.  
32  
33  
34  
35  
36  
37  
38  
39  
40

41 To explore non-linear trends in untreated decay between simple and complex prevention,  
42 longitudinal data will be analyzed using generalized additive models (GAMs) with non-parametric  
43 smoothers, linking the known known proportion  $p_{it} = E(y_{it} = 1 | x_{ijt}, z_{it})$  to a nonlinear nonparametric  
44 predictor using the link function  $n_{it} = g(u_{it}) = \ln(u_{it}/1 - u_{it}) = \sum_{j=1}^p s_j(x_{jit}) + z_{it}^T u_i$ , where  $s_j$  are  
45 smooth nonparametric functions and  $u_i$  are random effects assumed to be iid  $\sim N(0, D(\psi))$ <sup>29</sup>.  
46  
47  
48  
49  
50  
51  
52  
53 Heterogeneity and correlation among subjects will be accounted for through random effects.  
54  
55  
56  
57  
58  
59  
60

1  
2  
3 To compare the cost effectiveness of the two included treatments, empirical results will be  
4  
5 incorporated into a Markov decision tree and incremental cost-effectiveness ratios and net health  
6  
7 benefits will be estimated. Data for cost and health outcomes will be harvested from trees conducted  
8  
9 for short-term (e.g., the follow-up time of the presented clinical trial) and long-term (life course) time  
10  
11 horizons. Monte-Carlo simulation based probabilistic sensitivity analyses will be used to detect the  
12  
13 probabilities with which the two treatments represent optimum strategies. Finally, budget impact  
14  
15 analysis will be applied to estimate expected resource implications on the population level and to  
16  
17 determine whether and how potential cost savings could be used to increase population well-being.  
18  
19  
20  
21

22 Missing data will be adjusted for using multiple imputation and inverse probability weighting  
23  
24 (IPW). Statistical analysis will be performed following intention-to-treat and analyzed using Stata v15.0  
25  
26 (StataCorp LLC, College Station, TX, USA) and R v3.1.1.  
27  
28

### 29 **Ethics and dissemination**

30  
31  
32 Persistent unmet oral health needs in low-income and minority populations stem from an  
33  
34 inability to access or afford traditional, office-based dental care. The Institute of Medicine “envisions  
35  
36 oral health care in the United States in which everyone has access to quality oral care across the life  
37  
38 cycle”, which requires a collaborative effort across health systems to eliminate the health barriers  
39  
40 contributing to oral diseases and prioritize disease prevention<sup>30</sup>. In response, the Centers for Disease  
41  
42 Control and Prevention recommend school-based sealant programs, noting that a large proportion of  
43  
44 low-income children do not have access to dental sealants<sup>31</sup>. Simultaneously, the use of silver diamine  
45  
46 fluoride to arrest and prevent dental caries is growing<sup>32,33</sup>. Two added benefits to using SDF in school-  
47  
48 based prevention programs are that they are faster to provide than sealants and are less costly. Thus, if  
49  
50 SDF is shown to be non-inferior to sealants in the arrest and prevention of dental caries, it can be used  
51  
52 as an alternative intervention for school-based caries prevention with potentially broader impact.  
53  
54  
55  
56  
57  
58  
59  
60

1  
2  
3           The direct benefit anticipated for participating children is improved oral health. Due to the  
4  
5 minimally invasive nature of experimental interventions, no additional risks are expected.  
6  
7  
8 Demonstrating the non-inferiority of SDF to traditional and therapeutic sealants in the arrest and  
9  
10 prevention of dental caries in a pragmatic, school-based setting will yield objective data on the practical  
11  
12 effectiveness of an efficient, cost-effective caries prevention agent in high-risk populations. Results from  
13  
14 testable hypotheses can thus be used to encourage policy change to expand school-based health  
15  
16 services to include caries prevention.  
17  
18  
19  
20  
21  
22  
23  
24  
25  
26  
27  
28  
29  
30  
31  
32  
33  
34  
35  
36  
37  
38  
39  
40  
41  
42  
43  
44  
45  
46  
47  
48  
49  
50  
51  
52  
53  
54  
55  
56  
57  
58  
59  
60



### *Trial Status*

Protocol version 1.0 (11/30/17). Recruitment will begin August 2018. Recruitment will be on a rolling, semester-by-semester basis and will conclude June 2023. This trial is registered at [www.clinicaltrials.gov](http://www.clinicaltrials.gov) (registration #NCT03448107, registered 2/26/2018).

### *Acknowledgements*

The authors would like to thank the patient and stakeholder partners who have assisted in the design and development of this trial.

### *List of abbreviations*

NYU: New York University; SDF: silver diamine fluoride; ITR: interim therapeutic restorations; SPIRIT: Standard Protocol Items: Recommendations for Intervention Trials; DCC: Data Coordinating Center; IPW: inverse probability weighting; GEE: generalized estimating equations; ME-MLM: mixed effects multilevel models; DHHS: Department of Health and Human Services.

### *Funding*

This work is supported by the National Institute on Minority Health and Health Disparities (#R01MD011526; Niederman & Ruff, Principal Investigators).

### *Availability of data and materials*

The datasets generated from this study are available from study investigators upon reasonable request. Results from the proposed study will be presented at national conferences and published in annual reports and peer-reviewed journals.

### *Authors' contributions*

RN and RRR are the study principal investigators. RN and RRR participated in study conception and design and contributed to the writing of the study protocol. RN and RRR drafted and edited the trial protocol. RRR carried out all statistical analyses. All authors read and approved the final manuscript.

### *Ethics approval and consent to participate*

1  
2  
3 This study received approval from the New York University School of Medicine Institutional Review  
4 Board (approved October 3, 2017; #i17-00578). All students in participating schools will be invited to  
5 participate and parents will sign a consent form after reviewing written information about the study.  
6  
7  
8  
9

10 *Consent for publication*

11  
12 All authors consent to publication of this article.  
13  
14  
15

16 *Competing interests*

17  
18 The authors declare they have no competing interests.  
19  
20  
21  
22  
23  
24  
25  
26  
27  
28  
29  
30  
31  
32  
33  
34  
35  
36  
37  
38  
39  
40  
41  
42  
43  
44  
45  
46  
47  
48  
49  
50  
51  
52  
53  
54  
55  
56  
57  
58  
59  
60

1  
2  
3  
4  
5  
6  
7  
8  
9  
10  
11  
12  
13  
14  
15  
16  
17  
18  
19  
20  
21  
22  
23  
24  
25  
26  
27  
28  
29  
30  
31  
32  
33  
34  
35  
36  
37  
38  
39  
40  
41  
42  
43  
44  
45  
46  
47  
48  
49  
50  
51  
52  
53  
54  
55  
56  
57  
58  
59  
60

**Figure Legend**

Figure 1: Schedule of enrolment, interventions, and assessments

For peer review only

## References

1. Marcenes W, Kassebaum NJ, Bernabé E, et al. Global burden of oral conditions in 1990-2010: a systematic analysis. *Journal of dental research*. 2013;92(7):592-597.
2. Kassebaum NJ, Smith AGCB, E., Fleming TDAER, C, et al. Global, Regional, and National Prevalence, Incidence, and Disability-Adjusted Life Years for Oral Conditions for 195 Countries, 1990–2015: A Systematic Analysis for the Global Burden of Diseases, Injuries, and Risk Factors. *Journal of Dental Research*. 2017;96(4):380-387.
3. Robertson D, Smith AJ. The microbiology of the acute dental abscess. *J Med Microbiol*. 2009;58(Pt 2):155-162.
4. Pine CM, Harris RV, Burnside G, Merrett MC. An investigation of the relationship between untreated decayed teeth and dental sepsis in 5-year-old children. *British dental journal*. 2006;200(1):45-47; discussion 29.
5. Cooke B. The prevention of dental caries and oral sepsis. *Probe (Lond)*. 1970;13(3):83 passim.
6. Dye B, Li X, Thornton-Evans G. Oral health disparities as determined by selected Healthy People 2020 Oral Health objectives for the United States, 2009-2010. *NCHS Data Brief*. 2012;104:1-8.
7. Dye BA, Thornton-Evans G, Li X, Iafolla TJ. Dental caries and sealant prevalence in children and adolescents in the United States, 2011-2012. *NCHS data brief*. 2015(191):1-8.
8. Griffin SO, Wei L, Gooch BF, Weno K, Espinoza L. Vital Signs: Dental Sealant Use and Untreated Tooth Decay Among U.S. School-Aged Children. *MMWR Morb Mortal Wkly Rep*. 2016;65(41):1141-1145.
9. Dye BA, Thornton-Evans G. Trends in oral health by poverty status as measured by Healthy People 2010 objectives. *Public health reports (Washington, DC : 1974)*. 2010;125(6):817-830.
10. Dye BA, Li X, Thornton-Evans G. Oral health disparities as determined by selected healthy people 2020 oral health objectives for the United States, 2009-2010. *NCHS data brief*. 2012(104):1-8.
11. Webster AE, ed *Preparation of cavities for fillings*. Philadelphia: P. Blakiston's Son & Co; 1908.
12. Johnson CN, ed. A text-book of operative dentistry.
13. Vujicic M, Nasseh K. A decade in dental care utilization among adults and children (2001-2010). *Health Serv Res*. 2014;49(2):460-480.
14. Griffin SO, Barker LK, Wei L, et al. Use of dental care and effective preventive services in preventing tooth decay among U.S. Children and adolescents--Medical Expenditure Panel Survey, United States, 2003-2009 and National Health and Nutrition Examination Survey, United States, 2005-2010. *Morbidity and mortality weekly report Surveillance summaries*. 2014;63 Suppl 2:54-60.
15. A national call to action to promote oral health. In: U.S. Department of Health and Human Services PHS, Centers for Disease Control and Prevention, and the National Institutes of Health, National Institute of Dental and Craniofacial Research, ed. Rockville, MD: U.S. Department of Health and Human Services; May 2003.
16. Dye BA, Tan S, Smith V, et al. Trends in oral health status: United States, 1988-1994 and 1999-2004. *Vital Health Stat 11*. 2007;11(248):1-92.
17. Dye BA, Thornton-Evans G, Li X, Iafolla TJ. Dental caries and sealant prevalence in children and adolescents in the United States, 2011-2012. *NCHS Data Brief*. 2015;191.
18. Oral Health: efforts under way to improve children's access to dental services, but sustained attention needed to address ongoing concerns. In: Office USGA, ed: United States Government Accountability Office; 2010.
19. IOM. *Initial National Priorities for Comparative Effectiveness Research*. Washington DC: National Academies Press; 2009.

19. Marinho VC, Worthington HV, Walsh T, Clarkson JE. Fluoride varnishes for preventing dental caries in children and adolescents. *Cochrane Database Syst Rev*. 2013(7):CD002279.
20. Ahovuo-Saloranta A, Forss H, Walsh T, et al. Sealants for preventing dental decay in the permanent teeth. *Cochrane Database Syst Rev*. 2013(3):CD001830.
21. Yengopal V, Mickenautsch S, Bezerra AC, Leal SC. Caries-preventive effect of glass ionomer and resin-based fissure sealants on permanent teeth: a meta analysis. *Journal of oral science*. 2009;51(3):373-382.
22. de Amorim RG, Leal SC, Frencken JE. Survival of atraumatic restorative treatment (ART) sealants and restorations: a meta-analysis. *Clinical oral investigations*. 2012;16(2):429-441.
23. Rosenblatt A, Stamford TCM, Niederman R. Silver diamine fluoride: a caries "silver-fluoride bullet". *Journal of dental research*. 2009;88(2):116-125.
24. Zhi QH, Lo ECM, Lin HC. Randomized clinical trial on effectiveness of silver diamine fluoride and glass ionomer in arresting dentine caries in preschool children. *Journal of dentistry*. 2012;40(11):962-967.
25. Broder HL, Wilson-Genderson M. Reliability and convergent and discriminant validity of the Child Oral Health Impact Profile (COHIP Child's version). *Community dentistry and oral epidemiology*. 2007;35 Suppl 1:20-31.
26. Broder HL, Wilson-Genderson M, Sisco L. Reliability and validity testing for the Child Oral Health Impact Profile-Reduced (COHIP-SF 19). *J Public Health Dent*. 2012;72(4):302-312.
27. Diggle PJ, Heagerty P, Kung-Yee L, Zeger SL. *Analysis of Longitudinal Data*. Oxford U.K.: Oxford University Press; 2002.
28. Greene CJ, Morland LA, Durkalski VL, Frueh BC. Noninferiority and equivalence designs: issues and implications for mental health research. *J Trauma Stress*. 2008;21(5):433-439.
29. Sapa S. Semi-parametric mixed effects models for longitudinal data with applications in business and economics. *International Journal of Advanced Statistics and Probability*. 2014;2(2):84.
30. *Improving access to oral health care for vulnerable and underserved populations*. Washington, DC: Institute of Medicine of the National Academies;2011.
31. Gooch BF, Griffin SO, Gray SK, et al. Preventing dental caries through school-based sealant programs: updated recommendations and reviews of evidence. *J Am Dent Assoc*. 2009;140(11):1356-1365.
32. Llodra JC, Rodriguez A, Ferrer B, Menardia V, Ramos T, Morato M. Efficacy of silver diamine fluoride for caries reduction in primary teeth and first permanent molars of schoolchildren: 36-month clinical trial. *Journal of dental research*. 2005;84(8):721-724.
33. Horst JA, Ellenikiotis H, Milgrom PM. UCSF Protocol for Caries Arrest Using Silver Diamine Fluoride: Rationale, Indications, and Consent. *J Calif Dent Assoc*. 2016;44(1).

| TIMEPOINT                      | STUDY PERIOD |         |         |            |         |         |                 |                |                |                |                |                |                |                |                | Close-out |                 |                 |
|--------------------------------|--------------|---------|---------|------------|---------|---------|-----------------|----------------|----------------|----------------|----------------|----------------|----------------|----------------|----------------|-----------|-----------------|-----------------|
|                                | Enrolment    |         |         | Allocation |         |         | Post-allocation |                |                |                |                |                |                |                |                |           |                 |                 |
|                                | Phase 1      | Phase 2 | Phase 3 | Phase 1    | Phase 2 | Phase 3 | t <sub>1</sub>  | t <sub>2</sub> | t <sub>3</sub> | t <sub>4</sub> | t <sub>5</sub> | t <sub>6</sub> | t <sub>7</sub> | t <sub>8</sub> | t <sub>9</sub> |           | t <sub>10</sub> | t <sub>11</sub> |
| <b>ENROLMENT:</b>              |              |         |         |            |         |         |                 |                |                |                |                |                |                |                |                |           |                 |                 |
| Eligibility screen             | X            | X       | X       |            |         |         |                 |                |                |                |                |                |                |                |                |           |                 |                 |
| Informed consent               | X            | X       | X       |            |         |         |                 |                |                |                |                |                |                |                |                |           |                 |                 |
| Allocation                     |              |         |         | X          | X       | X       |                 |                |                |                |                |                |                |                |                |           |                 |                 |
| <b>INTERVENTIONS:</b>          |              |         |         |            |         |         |                 |                |                |                |                |                |                |                |                |           |                 |                 |
| Simple prevention              |              |         |         |            |         |         |                 |                |                |                |                |                |                |                |                |           |                 |                 |
| Complex prevention             |              |         |         |            |         |         |                 |                |                |                |                |                |                |                |                |           |                 |                 |
| <b>ASSESSMENTS:</b>            |              |         |         |            |         |         |                 |                |                |                |                |                |                |                |                |           |                 |                 |
| Baseline examination variables |              |         |         |            |         |         |                 |                |                |                |                |                |                |                |                |           |                 |                 |
| Caries arrest/prevalence       |              |         |         |            |         |         |                 |                |                |                |                |                |                |                |                |           |                 | X               |

97x48mm (300 x 300 DPI)

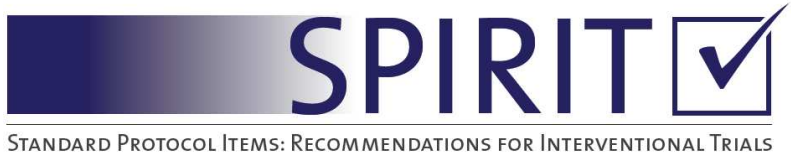

1  
2  
3  
4  
5  
6  
7  
8  
9  
10  
11  
12  
13  
14  
15  
16  
17  
18  
19  
20  
21  
22  
23  
24  
25  
26  
27  
28  
29  
30  
31  
32  
33  
34  
35  
36  
37  
38  
39  
40  
41  
42  
43  
44  
45  
46  
47

SPIRIT 2013 Checklist: Recommended items to address in a clinical trial protocol and related documents\*

| Section/item                      | Item No | Description                                                                                                                                                                                                                                                                              | Addressed on page number |
|-----------------------------------|---------|------------------------------------------------------------------------------------------------------------------------------------------------------------------------------------------------------------------------------------------------------------------------------------------|--------------------------|
| <b>Administrative information</b> |         |                                                                                                                                                                                                                                                                                          |                          |
| Title                             | 1       | Descriptive title identifying the study design, population, interventions, and, if applicable, trial acronym                                                                                                                                                                             | ___ 1 ___                |
| Trial registration                | 2a      | Trial identifier and registry name. If not yet registered, name of intended registry                                                                                                                                                                                                     | ___ 14 ___               |
|                                   | 2b      | All items from the World Health Organization Trial Registration Data Set                                                                                                                                                                                                                 | ___ 14 ___               |
| Protocol version                  | 3       | Date and version identifier                                                                                                                                                                                                                                                              | ___ 14 ___               |
| Funding                           | 4       | Sources and types of financial, material, and other support                                                                                                                                                                                                                              | ___ 14 ___               |
| Roles and responsibilities        | 5a      | Names, affiliations, and roles of protocol contributors                                                                                                                                                                                                                                  | ___ 14 ___               |
|                                   | 5b      | Name and contact information for the trial sponsor                                                                                                                                                                                                                                       | ___ 1 ___                |
|                                   | 5c      | Role of study sponsor and funders, if any, in study design; collection, management, analysis, and interpretation of data; writing of the report; and the decision to submit the report for publication, including whether they will have ultimate authority over any of these activities | ___ 14 ___               |
|                                   | 5d      | Composition, roles, and responsibilities of the coordinating centre, steering committee, endpoint adjudication committee, data management team, and other individuals or groups overseeing the trial, if applicable (see Item 21a for data monitoring committee)                         | ___ N/A ___              |

## Introduction

|                          |    |                                                                                                                                                                                                           |     |
|--------------------------|----|-----------------------------------------------------------------------------------------------------------------------------------------------------------------------------------------------------------|-----|
| Background and rationale | 6a | Description of research question and justification for undertaking the trial, including summary of relevant studies (published and unpublished) examining benefits and harms for each intervention        | 4-5 |
|                          | 6b | Explanation for choice of comparators                                                                                                                                                                     | 4   |
| Objectives               | 7  | Specific objectives or hypotheses                                                                                                                                                                         | 4-5 |
| Trial design             | 8  | Description of trial design including type of trial (eg, parallel group, crossover, factorial, single group), allocation ratio, and framework (eg, superiority, equivalence, noninferiority, exploratory) | 5   |

## Methods: Participants, interventions, and outcomes

|                      |     |                                                                                                                                                                                                                                                                                                                                                                                |       |
|----------------------|-----|--------------------------------------------------------------------------------------------------------------------------------------------------------------------------------------------------------------------------------------------------------------------------------------------------------------------------------------------------------------------------------|-------|
| Study setting        | 9   | Description of study settings (eg, community clinic, academic hospital) and list of countries where data will be collected. Reference to where list of study sites can be obtained                                                                                                                                                                                             | 6     |
| Eligibility criteria | 10  | Inclusion and exclusion criteria for participants. If applicable, eligibility criteria for study centres and individuals who will perform the interventions (eg, surgeons, psychotherapists)                                                                                                                                                                                   | 8     |
| Interventions        | 11a | Interventions for each group with sufficient detail to allow replication, including how and when they will be administered                                                                                                                                                                                                                                                     | 6-7   |
|                      | 11b | Criteria for discontinuing or modifying allocated interventions for a given trial participant (eg, drug dose change in response to harms, participant request, or improving/worsening disease)                                                                                                                                                                                 | NA    |
|                      | 11c | Strategies to improve adherence to intervention protocols, and any procedures for monitoring adherence (eg, drug tablet return, laboratory tests)                                                                                                                                                                                                                              | NA    |
|                      | 11d | Relevant concomitant care and interventions that are permitted or prohibited during the trial                                                                                                                                                                                                                                                                                  | NA    |
| Outcomes             | 12  | Primary, secondary, and other outcomes, including the specific measurement variable (eg, systolic blood pressure), analysis metric (eg, change from baseline, final value, time to event), method of aggregation (eg, median, proportion), and time point for each outcome. Explanation of the clinical relevance of chosen efficacy and harm outcomes is strongly recommended | 8     |
| Participant timeline | 13  | Time schedule of enrolment, interventions (including any run-ins and washouts), assessments, and visits for participants. A schematic diagram is highly recommended (see Figure)                                                                                                                                                                                               | Fig_1 |



1  
2  
3 Sample size 14 Estimated number of participants needed to achieve study objectives and how it was determined, including \_\_\_\_\_10\_\_\_\_\_  
4 clinical and statistical assumptions supporting any sample size calculations

5  
6 Recruitment 15 Strategies for achieving adequate participant enrolment to reach target sample size \_\_\_\_\_9\_\_\_\_\_  
7

8 **Methods: Assignment of interventions (for controlled trials)**  
9

10 Allocation:

11  
12 Sequence generation 16a Method of generating the allocation sequence (eg, computer-generated random numbers), and list of any \_\_\_\_\_8\_\_\_\_\_  
13 factors for stratification. To reduce predictability of a random sequence, details of any planned restriction  
14 (eg, blocking) should be provided in a separate document that is unavailable to those who enrol participants  
15 or assign interventions  
16

17 Allocation concealment mechanism 16b Mechanism of implementing the allocation sequence (eg, central telephone; sequentially numbered, \_\_\_\_\_NA\_\_\_\_\_  
18 opaque, sealed envelopes), describing any steps to conceal the sequence until interventions are assigned  
19  
20

21 Implementation 16c Who will generate the allocation sequence, who will enrol participants, and who will assign participants to \_\_\_\_\_8\_\_\_\_\_  
22 interventions  
23

24 Blinding (masking) 17a Who will be blinded after assignment to interventions (eg, trial participants, care providers, outcome \_\_\_\_\_9\_\_\_\_\_  
25 assessors, data analysts), and how  
26

27 17b If blinded, circumstances under which unblinding is permissible, and procedure for revealing a participant's \_\_\_\_\_9\_\_\_\_\_  
28 allocated intervention during the trial  
29  
30

31 **Methods: Data collection, management, and analysis**  
32

33 Data collection methods 18a Plans for assessment and collection of outcome, baseline, and other trial data, including any related \_\_\_\_\_9\_\_\_\_\_  
34 processes to promote data quality (eg, duplicate measurements, training of assessors) and a description of  
35 study instruments (eg, questionnaires, laboratory tests) along with their reliability and validity, if known.  
36 Reference to where data collection forms can be found, if not in the protocol  
37

38 18b Plans to promote participant retention and complete follow-up, including list of any outcome data to be \_\_\_\_\_NA\_\_\_\_\_  
39 collected for participants who discontinue or deviate from intervention protocols  
40  
41  
42  
43  
44

|    |                                 |     |                                                                                                                                                                                                                                                                                                                                       |                 |
|----|---------------------------------|-----|---------------------------------------------------------------------------------------------------------------------------------------------------------------------------------------------------------------------------------------------------------------------------------------------------------------------------------------|-----------------|
| 1  |                                 |     |                                                                                                                                                                                                                                                                                                                                       |                 |
| 2  |                                 |     |                                                                                                                                                                                                                                                                                                                                       |                 |
| 3  | Data management                 | 19  | Plans for data entry, coding, security, and storage, including any related processes to promote data quality (eg, double data entry; range checks for data values). Reference to where details of data management procedures can be found, if not in the protocol                                                                     | _____9_____     |
| 4  |                                 |     |                                                                                                                                                                                                                                                                                                                                       |                 |
| 5  |                                 |     |                                                                                                                                                                                                                                                                                                                                       |                 |
| 6  |                                 |     |                                                                                                                                                                                                                                                                                                                                       |                 |
| 7  | Statistical methods             | 20a | Statistical methods for analysing primary and secondary outcomes. Reference to where other details of the statistical analysis plan can be found, if not in the protocol                                                                                                                                                              | _____10-12_____ |
| 8  |                                 |     |                                                                                                                                                                                                                                                                                                                                       |                 |
| 9  |                                 |     |                                                                                                                                                                                                                                                                                                                                       |                 |
| 10 |                                 | 20b | Methods for any additional analyses (eg, subgroup and adjusted analyses)                                                                                                                                                                                                                                                              | _____12_____    |
| 11 |                                 |     |                                                                                                                                                                                                                                                                                                                                       |                 |
| 12 |                                 | 20c | Definition of analysis population relating to protocol non-adherence (eg, as randomised analysis), and any statistical methods to handle missing data (eg, multiple imputation)                                                                                                                                                       | _____12_____    |
| 13 |                                 |     |                                                                                                                                                                                                                                                                                                                                       |                 |
| 14 |                                 |     |                                                                                                                                                                                                                                                                                                                                       |                 |
| 15 | <b>Methods: Monitoring</b>      |     |                                                                                                                                                                                                                                                                                                                                       |                 |
| 16 |                                 |     |                                                                                                                                                                                                                                                                                                                                       |                 |
| 17 | Data monitoring                 | 21a | Composition of data monitoring committee (DMC); summary of its role and reporting structure; statement of whether it is independent from the sponsor and competing interests; and reference to where further details about its charter can be found, if not in the protocol. Alternatively, an explanation of why a DMC is not needed | _____NA_____    |
| 18 |                                 |     |                                                                                                                                                                                                                                                                                                                                       |                 |
| 19 |                                 |     |                                                                                                                                                                                                                                                                                                                                       |                 |
| 20 |                                 |     |                                                                                                                                                                                                                                                                                                                                       |                 |
| 21 |                                 |     |                                                                                                                                                                                                                                                                                                                                       |                 |
| 22 |                                 | 21b | Description of any interim analyses and stopping guidelines, including who will have access to these interim results and make the final decision to terminate the trial                                                                                                                                                               | _____NA_____    |
| 23 |                                 |     |                                                                                                                                                                                                                                                                                                                                       |                 |
| 24 |                                 |     |                                                                                                                                                                                                                                                                                                                                       |                 |
| 25 | Harms                           | 22  | Plans for collecting, assessing, reporting, and managing solicited and spontaneously reported adverse events and other unintended effects of trial interventions or trial conduct                                                                                                                                                     | _____7_____     |
| 26 |                                 |     |                                                                                                                                                                                                                                                                                                                                       |                 |
| 27 |                                 |     |                                                                                                                                                                                                                                                                                                                                       |                 |
| 28 | Auditing                        | 23  | Frequency and procedures for auditing trial conduct, if any, and whether the process will be independent from investigators and the sponsor                                                                                                                                                                                           | _____6_____     |
| 29 |                                 |     |                                                                                                                                                                                                                                                                                                                                       |                 |
| 30 |                                 |     |                                                                                                                                                                                                                                                                                                                                       |                 |
| 31 |                                 |     |                                                                                                                                                                                                                                                                                                                                       |                 |
| 32 | <b>Ethics and dissemination</b> |     |                                                                                                                                                                                                                                                                                                                                       |                 |
| 33 |                                 |     |                                                                                                                                                                                                                                                                                                                                       |                 |
| 34 | Research ethics approval        | 24  | Plans for seeking research ethics committee/institutional review board (REC/IRB) approval                                                                                                                                                                                                                                             | 6 (approved)    |
| 35 |                                 |     |                                                                                                                                                                                                                                                                                                                                       |                 |
| 36 |                                 |     |                                                                                                                                                                                                                                                                                                                                       |                 |
| 37 | Protocol amendments             | 25  | Plans for communicating important protocol modifications (eg, changes to eligibility criteria, outcomes, analyses) to relevant parties (eg, investigators, REC/IRBs, trial participants, trial registries, journals, regulators)                                                                                                      | _____6_____     |
| 38 |                                 |     |                                                                                                                                                                                                                                                                                                                                       |                 |
| 39 |                                 |     |                                                                                                                                                                                                                                                                                                                                       |                 |
| 40 |                                 |     |                                                                                                                                                                                                                                                                                                                                       |                 |
| 41 |                                 |     |                                                                                                                                                                                                                                                                                                                                       |                 |
| 42 |                                 |     |                                                                                                                                                                                                                                                                                                                                       |                 |
| 43 |                                 |     |                                                                                                                                                                                                                                                                                                                                       |                 |
| 44 |                                 |     |                                                                                                                                                                                                                                                                                                                                       |                 |
| 45 |                                 |     |                                                                                                                                                                                                                                                                                                                                       |                 |
| 46 |                                 |     |                                                                                                                                                                                                                                                                                                                                       |                 |
| 47 |                                 |     |                                                                                                                                                                                                                                                                                                                                       |                 |

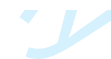

1  
2  
3  
4  
5  
6  
7  
8  
9  
10  
11  
12  
13  
14  
15  
16  
17  
18  
19  
20  
21  
22  
23  
24  
25  
26  
27  
28  
29  
30  
31  
32  
33  
34  
35  
36  
37  
38  
39  
40  
41  
42  
43  
44  
45  
46  
47

|                               |     |                                                                                                                                                                                                                                                                                     |             |
|-------------------------------|-----|-------------------------------------------------------------------------------------------------------------------------------------------------------------------------------------------------------------------------------------------------------------------------------------|-------------|
| Consent or assent             | 26a | Who will obtain informed consent or assent from potential trial participants or authorised surrogates, and how (see Item 32)                                                                                                                                                        | 9           |
|                               | 26b | Additional consent provisions for collection and use of participant data and biological specimens in ancillary studies, if applicable                                                                                                                                               | NA          |
| Confidentiality               | 27  | How personal information about potential and enrolled participants will be collected, shared, and maintained in order to protect confidentiality before, during, and after the trial                                                                                                | 9-10        |
| Declaration of interests      | 28  | Financial and other competing interests for principal investigators for the overall trial and each study site                                                                                                                                                                       | 15          |
| Access to data                | 29  | Statement of who will have access to the final trial dataset, and disclosure of contractual agreements that limit such access for investigators                                                                                                                                     | 14          |
| Ancillary and post-trial care | 30  | Provisions, if any, for ancillary and post-trial care, and for compensation to those who suffer harm from trial participation                                                                                                                                                       | NA          |
| Dissemination policy          | 31a | Plans for investigators and sponsor to communicate trial results to participants, healthcare professionals, the public, and other relevant groups (eg, via publication, reporting in results databases, or other data sharing arrangements), including any publication restrictions | 14          |
|                               | 31b | Authorship eligibility guidelines and any intended use of professional writers                                                                                                                                                                                                      | NA          |
|                               | 31c | Plans, if any, for granting public access to the full protocol, participant-level dataset, and statistical code                                                                                                                                                                     | NA          |
| <b>Appendices</b>             |     |                                                                                                                                                                                                                                                                                     |             |
| Informed consent materials    | 32  | Model consent form and other related documentation given to participants and authorised surrogates                                                                                                                                                                                  | Supp. Files |
| Biological specimens          | 33  | Plans for collection, laboratory evaluation, and storage of biological specimens for genetic or molecular analysis in the current trial and for future use in ancillary studies, if applicable                                                                                      | NA          |

---

\*It is strongly recommended that this checklist be read in conjunction with the SPIRIT 2013 Explanation & Elaboration for important clarification on the items. Amendments to the protocol should be tracked and dated. The SPIRIT checklist is copyrighted by the SPIRIT Group under the Creative Commons "[Attribution-NonCommercial-NoDerivs 3.0 Unported](https://creativecommons.org/licenses/by-nc-nd/3.0/)" license.

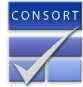

## CONSORT 2010 checklist of information to include when reporting a randomised trial\*

| Section/Topic                    | Item No | Checklist item                                                                                                                                                                              | Reported on page No |
|----------------------------------|---------|---------------------------------------------------------------------------------------------------------------------------------------------------------------------------------------------|---------------------|
| <b>Title and abstract</b>        |         |                                                                                                                                                                                             |                     |
|                                  | 1a      | Identification as a randomised trial in the title                                                                                                                                           | 1                   |
|                                  | 1b      | Structured summary of trial design, methods, results, and conclusions (for specific guidance see CONSORT for abstracts)                                                                     | 2                   |
| <b>Introduction</b>              |         |                                                                                                                                                                                             |                     |
| Background and objectives        | 2a      | Scientific background and explanation of rationale                                                                                                                                          | 3-4                 |
|                                  | 2b      | Specific objectives or hypotheses                                                                                                                                                           | 4-5                 |
| <b>Methods</b>                   |         |                                                                                                                                                                                             |                     |
| Trial design                     | 3a      | Description of trial design (such as parallel, factorial) including allocation ratio                                                                                                        | 6                   |
|                                  | 3b      | Important changes to methods after trial commencement (such as eligibility criteria), with reasons                                                                                          | NA                  |
| Participants                     | 4a      | Eligibility criteria for participants                                                                                                                                                       | 8                   |
|                                  | 4b      | Settings and locations where the data were collected                                                                                                                                        | 6                   |
| Interventions                    | 5       | The interventions for each group with sufficient details to allow replication, including how and when they were actually administered                                                       | 6-7                 |
| Outcomes                         | 6a      | Completely defined pre-specified primary and secondary outcome measures, including how and when they were assessed                                                                          | 8                   |
|                                  | 6b      | Any changes to trial outcomes after the trial commenced, with reasons                                                                                                                       | NA                  |
| Sample size                      | 7a      | How sample size was determined                                                                                                                                                              | 10                  |
|                                  | 7b      | When applicable, explanation of any interim analyses and stopping guidelines                                                                                                                | NA                  |
| <b>Randomisation:</b>            |         |                                                                                                                                                                                             |                     |
| Sequence generation              | 8a      | Method used to generate the random allocation sequence                                                                                                                                      | 8                   |
|                                  | 8b      | Type of randomisation; details of any restriction (such as blocking and block size)                                                                                                         | 8                   |
| Allocation concealment mechanism | 9       | Mechanism used to implement the random allocation sequence (such as sequentially numbered containers), describing any steps taken to conceal the sequence until interventions were assigned | 8                   |
| Implementation                   | 10      | Who generated the random allocation sequence, who enrolled participants, and who assigned participants to interventions                                                                     | 8                   |
| Blinding                         | 11a     | If done, who was blinded after assignment to interventions (for example, participants, care providers, those                                                                                | 9                   |

|    |                          |                                                                                                                     |       |
|----|--------------------------|---------------------------------------------------------------------------------------------------------------------|-------|
| 1  |                          |                                                                                                                     |       |
| 2  |                          | assessing outcomes) and how                                                                                         |       |
| 3  |                          |                                                                                                                     |       |
| 4  |                          | 11b If relevant, description of the similarity of interventions                                                     | NA    |
| 5  | Statistical methods      | 12a Statistical methods used to compare groups for primary and secondary outcomes                                   | 10-12 |
| 6  |                          | 12b Methods for additional analyses, such as subgroup analyses and adjusted analyses                                | 10-12 |
| 7  |                          |                                                                                                                     |       |
| 8  | <b>Results</b>           |                                                                                                                     |       |
| 9  | Participant flow (a      | 13a For each group, the numbers of participants who were randomly assigned, received intended treatment, and        |       |
| 10 | diagram is strongly      | were analysed for the primary outcome                                                                               | TBD   |
| 11 | recommended)             | 13b For each group, losses and exclusions after randomisation, together with reasons                                | TBD   |
| 12 | Recruitment              | 14a Dates defining the periods of recruitment and follow-up                                                         | TBD   |
| 13 |                          | 14b Why the trial ended or was stopped                                                                              | TBD   |
| 14 | Baseline data            | 15 A table showing baseline demographic and clinical characteristics for each group                                 | TBD   |
| 15 | Numbers analysed         | 16 For each group, number of participants (denominator) included in each analysis and whether the analysis was      |       |
| 16 |                          | by original assigned groups                                                                                         | TBD   |
| 17 |                          |                                                                                                                     |       |
| 18 | Outcomes and             | 17a For each primary and secondary outcome, results for each group, and the estimated effect size and its           |       |
| 19 | estimation               | precision (such as 95% confidence interval)                                                                         | TBD   |
| 20 |                          | 17b For binary outcomes, presentation of both absolute and relative effect sizes is recommended                     | TBD   |
| 21 | Ancillary analyses       | 18 Results of any other analyses performed, including subgroup analyses and adjusted analyses, distinguishing       |       |
| 22 |                          | pre-specified from exploratory                                                                                      | TBD   |
| 23 |                          |                                                                                                                     |       |
| 24 | Harms                    | 19 All important harms or unintended effects in each group (for specific guidance see CONSORT for harms)            | TBD   |
| 25 |                          |                                                                                                                     |       |
| 26 | <b>Discussion</b>        |                                                                                                                     |       |
| 27 | Limitations              | 20 Trial limitations, addressing sources of potential bias, imprecision, and, if relevant, multiplicity of analyses | TBD   |
| 28 | Generalisability         | 21 Generalisability (external validity, applicability) of the trial findings                                        | TBD   |
| 29 | Interpretation           | 22 Interpretation consistent with results, balancing benefits and harms, and considering other relevant evidence    | TBD   |
| 30 |                          |                                                                                                                     |       |
| 31 | <b>Other information</b> |                                                                                                                     |       |
| 32 | Registration             | 23 Registration number and name of trial registry                                                                   | 14    |
| 33 | Protocol                 | 24 Where the full trial protocol can be accessed, if available                                                      | 14    |
| 34 | Funding                  | 25 Sources of funding and other support (such as supply of drugs), role of funders                                  | 14    |
| 35 |                          |                                                                                                                     |       |

36

37 \*We strongly recommend reading this statement in conjunction with the CONSORT 2010 Explanation and Elaboration for important clarifications on all the items. If relevant, we also

38 recommend reading CONSORT extensions for cluster randomised trials, non-inferiority and equivalence trials, non-pharmacological treatments, herbal interventions, and pragmatic trials.

39 Additional extensions are forthcoming: for those and for up to date references relevant to this checklist, see [www.consort-statement.org](http://www.consort-statement.org).

40

41

# BMJ Open

## Comparative effectiveness of treatments to prevent dental caries given to rural children in school-based settings: protocol for a cluster randomized controlled trial

|                                 |                                                                                                                                                                                                                                           |
|---------------------------------|-------------------------------------------------------------------------------------------------------------------------------------------------------------------------------------------------------------------------------------------|
| Journal:                        | <i>BMJ Open</i>                                                                                                                                                                                                                           |
| Manuscript ID                   | bmjopen-2018-022646.R1                                                                                                                                                                                                                    |
| Article Type:                   | Protocol                                                                                                                                                                                                                                  |
| Date Submitted by the Author:   | 20-Mar-2018                                                                                                                                                                                                                               |
| Complete List of Authors:       | Ruff, Ryan; New York University College of Dentistry, Epidemiology & Health Promotion; New York University College of Global Public Health, Niederman, Richard; New York University College of Dentistry, Epidemiology & Health Promotion |
| <b>Primary Subject Heading</b>: | Dentistry and oral medicine                                                                                                                                                                                                               |
| Secondary Subject Heading:      | Dentistry and oral medicine, Epidemiology, Public health                                                                                                                                                                                  |
| Keywords:                       | PREVENTIVE MEDICINE, ORAL MEDICINE, EPIDEMIOLOGY                                                                                                                                                                                          |
|                                 |                                                                                                                                                                                                                                           |

SCHOLARONE™  
Manuscripts

1  
2  
3  
4  
5  
6  
7  
8 **Comparative effectiveness of treatments to prevent dental caries**  
9 **given to rural children in school-based settings: protocol for a cluster**  
10 **randomized controlled trial**  
11  
12

13 Ryan Richard Ruff<sup>1,2</sup> and Richard Niederman<sup>1</sup>  
14

- 15  
16 1. *Department of Epidemiology & Health Promotion, New York University College of Dentistry*  
17 2. *New York University College of Global Public Health*  
18

19 Correspondence to:  
20 Ryan Richard Ruff, MPH, PhD  
21 NYU College of Dentistry  
22 433 First Avenue, Room 712  
23 New York, NY, 10010  
24 Tel: 212-998-9663  
25 E-mail: [ryan.ruff@nyu.edu](mailto:ryan.ruff@nyu.edu)  
26  
27

28 Running title: Comparative effectiveness  
29

30 Total number of pages, figures, and supplementary tables: 19  
31

32 Submitted to: Trials  
33 Date: 2/27/18  
34  
35  
36  
37

38 Abstract word count: 258  
39 Manuscript word count: 2891  
40 Figures: 1  
41 Tables: 0  
42  
43  
44  
45  
46  
47  
48  
49  
50  
51  
52  
53  
54  
55  
56  
57  
58  
59  
60

## Abstract

**Introduction:** Dental caries is the most prevalent childhood disease in the world and can lead to infection, pain, and reduced quality of life. Multiple prevention agents are available to arrest and prevent dental caries; however little is known of the comparative effectiveness of combined treatments when applied in pragmatic settings. The aim of the presented study is to compare the benefit of silver diamine fluoride and fluoride varnish versus fluoride varnish and glass ionomer therapeutic sealants in the arrest and prevention of dental caries.

**Methods and Analysis:** A longitudinal, pragmatic, cluster randomized, single-blind, non-inferiority trial will be conducted in low-income rural children enrolled in public elementary schools in New Hampshire, United States, from 2018-2023. The primary objective is to compare the non-inferiority of alternative agents in the arrest and prevention of dental caries. The secondary objective is to compare cost-effectiveness of both interventions. Caries arrest will be evaluated after two years, and caries prevention will be assessed at the completion of the study. Data analysis will follow intent to treat, and statistical analyses will be conducted using a significance level of 0.05.

**Ethics and Dissemination:** The standard of care for dental caries is office-based surgery, which presents multiple barriers to care including cost, fear, and geographic isolation. The common intervention used in school-based caries prevention is dental sealants. The simplicity and affordability of silver diamine fluoride may be a viable alternative for the prevention of dental caries in high-risk children. Results can be used to inform policy for best practices in school-based oral health care.

**Trial registration:** NCT03448107, registered on 2/26/18



### Strengths and limitations of this study

- Study is a cluster randomized non-inferiority trial
- Study will compare simple and complex interventions for the treatment and prevention of dental caries measured using standard clinical diagnostic criteria
- Statistical and economic analysis will utilize multilevel modeling, generalized additive modeling, and Markov modeling
- Interventions will be randomly assigned at the school level; any child within each participating school that provides informed consent and assent will receive care twice yearly

## Background

Dental caries (tooth decay), a gram positive, aerophilic bacterial infection, is the most prevalent childhood disease in the world, estimated to cause a loss of 3.5 million disability adjusted life years<sup>1,2</sup>. If left untreated, dental caries can lead to acute abscess, sepsis, and in rare circumstances, systemic infection and death<sup>3-5</sup>. Untreated dental caries affects more than 20% of elementary school-aged children in the United States, and over 50% of children have ever experienced caries. Among low-income minority children, caries experience can be greater than 70%, and the prevalence of untreated caries exceeds 30%<sup>6-8</sup>. Though the overall prevalence of caries has reduced over the past ten years, sealant use is lowest among low-income children, and less than half of children from low-income families reported visiting a dentist in the previous year<sup>8-10</sup>.

The standard of care for dental caries is office-based surgery consisting of local anesthesia, removal of decay using a dental drill, etching of the tooth with acidic gel, application of an amalgam, composite resin, ionomer, gold, or ceramic material, hardening, and polishing<sup>11</sup>. However, office-based care presents multiple access barriers to patients including cost, fear, and geographic isolation<sup>12</sup>. Fewer than 15% of children who accessed an office-based dentist received preventive care<sup>13</sup>, many children do not have access to prevention services<sup>14</sup>, and those with the least access to prevention have a higher prevalence of oral disease<sup>14</sup>. As a result, many federal and state organizations and institutions recommend the proactive prevention of caries as an alternative to reactive treatment<sup>14-17</sup>. Caries prevention can be provided through traditional office-based care, mobile dental vans, or as part of a school-based dental program, and the comparative effectiveness of these prevention models has been identified as one of the highest-priority research questions by the Institute of Medicine<sup>18</sup>.

Common caries prevention agents include water fluoridation, fluoride toothpaste, fluoride varnish, sealants, interim therapeutic restorations or atraumatic restorations, and silver diamine fluoride

1  
2  
3 (SDF). Individually, each of these preventive treatments has been shown in randomized clinical trials and  
4  
5 systematic reviews to be efficacious in the prevention or treatment of dental caries. A review of thirteen  
6  
7 trials in children and adolescents found that those treated with fluoride varnish experienced an average  
8  
9 reduction of decayed, missing, or filled tooth surfaces of 43% when compared to untreated youth<sup>19</sup>. A  
10  
11 systematic review of six trials showed that resin-based sealants significantly reduced the risk of caries in  
12  
13 permanent molars up to 48 months compared to no sealants, and estimated that if 70% of control  
14  
15 unsealed tooth surfaces were decayed, application of a resin-based sealant would significantly reduce  
16  
17 the proportion of carious surfaces to under 19%<sup>20</sup>. Further, there was not sufficient evidence in both  
18  
19 systematic reviews and meta-analyses to suggest the superiority of the preventive effects of either  
20  
21 resin-based or glass-ionomer sealant material<sup>20,21</sup>. A 2012 meta-analysis of 29 studies indicated that pits  
22  
23 and fissures of teeth sealed with interim therapeutic restorations had a mean annual caries incidence  
24  
25 over three years of only one percent<sup>22</sup>. Finally, silver diamine fluoride has been shown in reviews to  
26  
27 have higher preventive fractions of arrested and prevented caries than fluoride varnish<sup>23</sup>, and SDF at  
28  
29 38% concentration applied biannually was more effective in preventing caries than annual applications  
30  
31 of lower concentrations<sup>24</sup>.

32  
33  
34  
35  
36  
37 Despite this evidence, the combined effectiveness of different treatments, as well as their  
38  
39 feasibility for use in pragmatic settings, is unknown. The objectives of the presented longitudinal,  
40  
41 pragmatic, cluster randomized, single-blind, non-inferiority trial are to compare the clinical and cost  
42  
43 effectiveness of a simple prevention package (consisting of fluoride varnish and SDF) versus a complex  
44  
45 prevention package (consisting of fluoride varnish and therapeutic sealants) in the arrest and prevention  
46  
47 of dental caries among low-income rural children in primary school settings. It is hypothesized that  
48  
49 simple caries prevention is non-inferior to complex care and is more cost-effective for large-scale  
50  
51 implementation.  
52  
53  
54  
55  
56  
57  
58  
59  
60

## Methods/Design

This is a longitudinal, pragmatic, cluster randomized, single-blind, non-inferiority clinical trial comparing silver diamine fluoride with fluoride varnish versus therapeutic sealants with fluoride varnish given biannually to children enrolled in public elementary schools in New Hampshire. Prior to the study start, participating schools meeting inclusion criteria will be randomly assigned to receive fluoride varnish/SDF or fluoride varnish/sealants in six-month intervals ( $\pm 1$  month). At each observational period, study participants with informed consent will receive a comprehensive oral examination provided by a licensed dental hygienist (Figure 1)<sup>25,26</sup>. The clinical examination will include an assessment of every tooth and tooth surface for decayed, filled, or missing teeth, as well as pulpal involvement or abscess. Following the oral evaluation, participants will receive the assigned treatments. Any participant presenting with a medical emergency will be referred to school nurses for follow-up care.

This trial protocol is reported following the Standard Protocol Items: Recommendations for Interventional Trials (SPIRIT) guidelines and has received approval from the New York University School of Medicine Institutional Review Board (#i17-01221). Any changes to the study protocol will be communicated to the IRB and funder in quarterly reports, and investigators will cooperate with any independent audit on behalf of the IRB or funding organization. The study was registered at [www.clinicaltrials.gov](http://www.clinicaltrials.gov) (#NCT03448107).

### ***Treatment description and regimen***

*Simple Prevention.* One drop (0.05 ml) of silver diamine fluoride (Advantage Arrest<sup>TM</sup>) solution at 38% concentration (2.24 F-ion mg/dose) will be dispensed per child. Posterior tooth surfaces to be treated will be dried, after which the SDF will be applied with a microbrush to all asymptomatic carious lesions and to all pits and fissures on bicuspid and molar teeth for thirty seconds. Fluoride varnish (5%

1  
2  
3 NaF) will then be applied to all teeth. Simple prevention will be provided by either dental hygienists or  
4  
5 registered nurses.  
6  
7

8 *Complex Prevention.* All primary and permanent teeth will be dried prior to application. Pits and  
9  
10 fissures on all bicuspid and molar teeth will be sealed with glass ionomer sealants (GC Fuji IX). Glass  
11  
12 ionomer sealants (interim therapeutic restorations) will also be placed on all asymptomatic carious  
13  
14 lesions. Fluoride varnish (5% NaF) will then be applied to all teeth. Complex prevention will be provided  
15  
16 by dental hygienists.  
17  
18

19  
20 Both arms will also receive toothbrushes, fluoride toothpaste, and oral hygiene instruction.  
21  
22 Clinical care will be provided in a dedicated room in each school using mobile equipment and disposable  
23  
24 supplies.  
25  
26

### 27 28 **Risks and Adverse Events** 29

30  
31 Each intervention used in this trial is currently employed in clinical practice as a standard of care  
32  
33 procedure. The potential risks for study participants are minimal and identical to the risk for children  
34  
35 obtaining care in a dental office. The greatest risk is an allergic reaction to fluoride varnish, silver  
36  
37 diamine fluoride, or glass ionomer. All adverse events occurring during the study period will be  
38  
39 recorded: at each contact with the study participant, investigators will seek information on adverse  
40  
41 events by specific questions and an oral examination. Evidence of adverse events will be recorded on  
42  
43 electronic health records and appropriate case report forms. The clinical course of each event will be  
44  
45 followed until resolution, stabilization, or until it has been determined that participation in the study  
46  
47 was not the cause. Serious adverse events ongoing at study end will be followed to determine the final  
48  
49 outcome. Adverse event reports will be reported to the IRB within five working days from the time  
50  
51 investigators become aware of the event.  
52  
53  
54  
55  
56  
57  
58  
59  
60

### **Definition of outcome measures**

*Primary outcome measures.* Primary outcomes include clinically-evaluated caries arrest and the prevention of new caries. Caries arrest will be evaluated after two years and the prevalence of new caries will be evaluated after five years.

*Secondary outcome measures.* Secondary outcomes include the comparative cost effectiveness of simple versus complex prevention in the arrest and prevention of dental caries.

### **Recruitment & Eligibility**

In collaboration with the New Hampshire Department of Health and Human Services (DHHS), study investigators identified extant school-based caries prevention programs currently operating in rural counties in New Hampshire. Program officials were contacted to solicit interest in participating in the proposed study. Program officials, in turn, contacted school principals to determine interest in participation. Each participating program and school has confirmed written consent for the study.

*Inclusion Criteria.* Any existing caries prevention program operating in rural (defined using criteria from the U.S. Department of Agriculture) areas, with official Title 1 status, and located in a health professional shortage area was eligible to participate. All schools within eligible programs were eligible to participate.

### **Randomization**

Participating schools will be block randomized at the school level to receive either the simple or complex treatment using a random number generator. Study statisticians will generate random numbers and assign schools to each number sequence.

### **Blinding**

1  
2  
3 Due to the nature of the treatments provided, dental hygienists providing care will not be  
4 independent from study protocols and therefore are not blinded. Assignment to treatments will follow a  
5 predetermined randomization list at the school level, and all students with consent in participating  
6 schools will receive the assigned treatment. However, all data analyses for caries arrest will be blinded,  
7 as data will be masked prior to analysis such that which schools were assigned to each treatment cannot  
8 be determined. Following analysis of caries arrest, blinding can no longer be guaranteed.  
9  
10  
11  
12  
13  
14  
15

16  
17 ***Data collection, transmission, and storage***  
18

19  
20 Prior to the beginning of each school year, electronic rosters for each participating school will be  
21 provided to study investigators from the DHHS, which will include a unique student identifier,  
22 demographic variables, and any available Medicaid identification. School rosters will be used to  
23 electronically create personalized informed consent forms for every student in the school, which will  
24 then be combined with a letter from the principal explaining the study and distributed to parents of  
25 children in each school. Completed informed consent will be collected at the school by study  
26 investigators. Schools will be recruited in the first year of the study. Children within schools will be  
27 enrolled in each year of the program to accommodate newly registered students each academic year.  
28 Recruitment for this study is pending.  
29  
30  
31  
32  
33  
34  
35  
36  
37  
38  
39  
40

41 Data collected from each participant will be recorded on a password-protected tablet computer  
42 using a propriety software system that is pre-populated with the demographic information of the  
43 participant from previously obtained DHHS records. Data collectors will be standardized and calibrated  
44 prior to study start. Following each data collection day of the study, electronic records will be uploaded  
45 to a secure server and stored at the Boston University Data Coordinating Center (DCC) and evaluated for  
46 quality assurance. Prior to the transmission of data from the DCC to investigators, identifying  
47  
48  
49  
50  
51  
52  
53  
54  
55  
56  
57  
58  
59  
60

1  
2  
3 information will be removed and replaced with a unique, anonymized student identifier. This data will  
4  
5 be kept at the New York University College of Dentistry on a secure, password-protected server.  
6  
7

### 8 ***Patient and Public Involvement*** 9

10  
11 Planning for this study began over five years ago with pilot studies and meetings with  
12  
13 community stakeholders. Stakeholders included representatives from the New Hampshire DHHS  
14  
15 Medicaid and Oral Health offices, state dental societies and insurers, community health centers, and a  
16  
17 local hospital. The study design was thus informed by stakeholder priorities and preferences, including  
18  
19 development of protocols, selection and burden of interventions, training for hygienists, and planned  
20  
21 implementation. The design was further created with input from parents of pilot study patients who  
22  
23 were participants in group discussions regarding prevention protocols. However, patients themselves  
24  
25 were not directly involved.  
26  
27  
28  
29

30 For this study, parents will be participants in that they will sign informed consent documents.  
31  
32 Parents of participating children will also participate in group quarterly and annual meetings. While  
33  
34 direct study results will not be disseminated to participants, children will receive a personalized take  
35  
36 home message after each clinical visit that summarizes the care they received and the care still needed.  
37  
38 Formal study results will be disseminated to community stakeholders.  
39  
40  
41

### 42 ***Sample size calculation*** 43 44

45 The study is powered for the primary outcomes of caries arrest and prevention. Power  
46  
47 calculation for caries arrest assumes a clustered two-group comparison of simple versus complex  
48  
49 prevention for a non-inferiority trial. Estimates assume an overall participation rate of 35% across each  
50  
51 of the two groups, yielding a total enrollment of 3,926 students within 43 schools. Previous studies of  
52  
53 school-based caries prevention in New Hampshire rural elementary schools indicated a baseline caries  
54  
55  
56  
57  
58  
59



1  
2  
3 prevalence between 30-40%. Assuming an equal allocation of untreated decay across groups of 20% and  
4  
5 alpha of 0.05, a total sample size of 198 participants per arm (N=396) would be required for a non-  
6  
7 inferiority margin ( $\delta$ ) of caries arrest at 10%, assuming 80% power. When adjusted for within-school  
8  
9 clustering ( $d_{eff} = 10$ ), a sample size of 3,960 is required.

10  
11  
12  
13 Power for longitudinal analyses of caries prevention was computed for the use of generalized  
14  
15 estimating equations<sup>27</sup>. Using the same expected enrollment of 3,926 students, estimates assume an  
16  
17 annual attrition rate of 20% and a natural increase in informed consent rates of 10% (which also includes  
18  
19 new students entering schools and enrolling in the study) per year. For 95% power, an alpha of 0.05, an  
20  
21 average of four observational periods (excluding baseline), a high correlation between repeated  
22  
23 observations ( $r = 0.6$ ), and a design effect of 20, a sample size of 1,961 students per arm is required to  
24  
25 detect a difference in untreated decay of 15% and 2,942 for a difference of 10%.

### 26 27 28 29 **Statistical Analysis**

30  
31  
32 For the non-inferiority of caries arrest, the per-patient proportion of carious lesions at baseline  
33  
34 treated with simple versus complex prevention that stayed arrested throughout the first two years of  
35  
36 observation will be determined. Any deciduous teeth with treated carious lesions that are lost due to  
37  
38 exfoliation will be considered as arrested throughout the lifetime of the tooth, with arrested caries  
39  
40 status being carried over throughout. Thus, tooth-level indicators are able to be present for both  
41  
42 primary and permanent dentitions at the same time. With this approach, each carious tooth treated  
43  
44 with either simple or comprehensive prevention is a single trial with outcomes either of arrested (1) or  
45  
46 failed to arrest (0). The percentage of arrested caries (at the child level) will thus be modeled using  
47  
48 multilevel binomial regression with a logit link  $Y_j \sim \text{Bin}(\pi_j)$ ,  $E(Y_j) = \pi_j$ ; where  $\pi_j$  is the probability of success.  
49  
50  
51 The noninferiority margin,  $\delta$ , is set at 10%. While there is no gold standard criterion for the selection of  
52  
53 this margin, the margin was set based on collaborative discussion with clinicians to determine what is  
54  
55  
56  
57  
58  
59  
60

1  
2  
3 considered as clinically unimportant. The null hypothesis is that the experimental treatment (simple  
4 prevention) is inferior to the standard treatment (complex prevention) by at least  $\delta$ :  $\pi_{\text{simple}} - \pi_{\text{complex}} \geq \delta$ .

5  
6  
7  
8 The alternative hypothesis is that  $\pi_{\text{simple}} - \pi_{\text{complex}} < \delta$ .

9  
10  
11 Based on results from multilevel binomial models, differences in effect sizes estimated by  
12 confidence intervals will be used to determine clinical non-inferiority of the two prevention methods<sup>28</sup>.  
13  
14 Confidence intervals will be calculated for the difference between the two interventions, with the width  
15 of this interval signifying the extent of noninferiority. If the difference between the two interventions  
16 lies to the right of  $\delta$ , then noninferiority will be concluded. Though this method is preferred by  
17 reporting guidelines, p-values will also be reported, in keeping with other recommendations<sup>28</sup>.  
18  
19  
20  
21  
22  
23  
24

25 For the prevention of new caries, longitudinal data will be analyzed using generalized estimating  
26 equations (GEE) and multilevel mixed effects regression models (ML-MEM) with the appropriate error  
27 distribution for the prevalence and incidence of untreated caries over time. The number of teeth at risk  
28 for each child during each follow-up interval will be identified and the number of those teeth in which  
29 new caries is observed at the examination that ends that interval will be determined. Primary teeth lost  
30 in each interval and new permanent teeth will not contribute to data for that interval. Data from  
31 baseline visits will be omitted from analyses and used as an indicator of any untreated decay at baseline.  
32  
33  
34  
35  
36  
37  
38  
39  
40

41 To explore non-linear trends in untreated decay between simple and complex prevention,  
42 longitudinal data will be analyzed using generalized additive models (GAMs) with non-parametric  
43 smoothers, linking the known known proportion  $p_{it} = E(y_{it} = 1 | x_{ijt}, z_{it})$  to a nonlinear nonparametric  
44 predictor using the link function  $n_{it} = g(u_{it}) = \ln(u_{it}/1 - u_{it}) = \sum_{j=1}^p s_j(x_{jit}) + z_{it}^T u_i$ , where  $s_j$  are  
45 smooth nonparametric functions and  $u_i$  are random effects assumed to be iid  $\sim N(0, D(\psi))$ <sup>29</sup>.  
46  
47  
48  
49  
50  
51  
52  
53 Heterogeneity and correlation among subjects will be accounted for through random effects.  
54  
55  
56  
57  
58  
59  
60

1  
2  
3 To compare the cost effectiveness of the two included treatments, empirical results will be  
4  
5 incorporated into a Markov decision tree and incremental cost-effectiveness ratios and net health  
6  
7 benefits will be estimated. Data for cost and health outcomes will be harvested from trees conducted  
8  
9 for short-term (e.g., the follow-up time of the presented clinical trial) and long-term (life course) time  
10  
11 horizons. Monte-Carlo simulation based probabilistic sensitivity analyses will be used to detect the  
12  
13 probabilities with which the two treatments represent optimum strategies. Finally, budget impact  
14  
15 analysis will be applied to estimate expected resource implications on the population level and to  
16  
17 determine whether and how potential cost savings could be used to increase population well-being.  
18  
19  
20  
21

22 Missing data will be adjusted for using multiple imputation and inverse probability weighting  
23  
24 (IPW). Statistical analysis will be performed following intention-to-treat and analyzed using Stata v15.0  
25  
26 (StataCorp LLC, College Station, TX, USA) and R v3.1.1.  
27  
28

### 29 **Ethics and dissemination**

30  
31  
32 Persistent unmet oral health needs in low-income and minority populations stem from an  
33  
34 inability to access or afford traditional, office-based dental care. The Institute of Medicine “envisions  
35  
36 oral health care in the United States in which everyone has access to quality oral care across the life  
37  
38 cycle”, which requires a collaborative effort across health systems to eliminate the health barriers  
39  
40 contributing to oral diseases and prioritize disease prevention<sup>30</sup>. In response, the Centers for Disease  
41  
42 Control and Prevention recommend school-based sealant programs, noting that a large proportion of  
43  
44 low-income children do not have access to dental sealants<sup>31</sup>. Simultaneously, the use of silver diamine  
45  
46 fluoride to arrest and prevent dental caries is growing<sup>32,33</sup>. Two added benefits to using SDF in school-  
47  
48 based prevention programs are that they are faster to provide than sealants and are less costly. Thus, if  
49  
50 SDF is shown to be non-inferior to sealants in the arrest and prevention of dental caries, it can be used  
51  
52 as an alternative intervention for school-based caries prevention with potentially broader impact.  
53  
54  
55  
56  
57  
58  
59  
60

1  
2  
3 The direct benefit anticipated for participating children is improved oral health. Due to the  
4 minimally invasive nature of experimental interventions, no additional risks are expected.  
5  
6  
7 Demonstrating the non-inferiority of SDF to traditional and therapeutic sealants in the arrest and  
8 prevention of dental caries in a pragmatic, school-based setting will yield objective data on the practical  
9 effectiveness of an efficient, cost-effective caries prevention agent in high-risk populations. Results from  
10 testable hypotheses can thus be used to encourage policy change to expand school-based health  
11 services to include caries prevention.  
12  
13  
14  
15  
16  
17  
18  
19  
20  
21  
22  
23  
24  
25  
26  
27  
28  
29  
30  
31  
32  
33  
34  
35  
36  
37  
38  
39  
40  
41  
42  
43  
44  
45  
46  
47  
48  
49  
50  
51  
52  
53  
54  
55  
56  
57  
58  
59  
60

### *Trial Status*

Protocol version 1.0 (11/30/17). Recruitment will begin August 2018. Recruitment will be on a rolling, semester-by-semester basis and will conclude June 2023. This trial is registered at [www.clinicaltrials.gov](http://www.clinicaltrials.gov) (registration #NCT03448107, registered 2/26/2018).

### *Acknowledgements*

The authors would like to thank the patient and stakeholder partners who have assisted in the design and development of this trial.

### *List of abbreviations*

NYU: New York University; SDF: silver diamine fluoride; ITR: interim therapeutic restorations; SPIRIT: Standard Protocol Items: Recommendations for Intervention Trials; DCC: Data Coordinating Center; IPW: inverse probability weighting; GEE: generalized estimating equations; ME-MLM: mixed effects multilevel models; DHHS: Department of Health and Human Services.

### *Funding*

This work is supported by the National Institute on Minority Health and Health Disparities (#R01MD011526; Niederman & Ruff, Principal Investigators).

### *Availability of data and materials*

The datasets generated from this study are available from study investigators upon reasonable request. Results from the proposed study will be presented at national conferences and published in annual reports and peer-reviewed journals.

### *Authors' contributions*

RN and RRR are the study principal investigators. RN and RRR participated in study conception and design and contributed to the writing of the study protocol. RN and RRR drafted and edited the trial protocol. RRR carried out all statistical analyses. All authors read and approved the final manuscript.

### *Ethics approval and consent to participate*

1  
2  
3 This study received approval from the New York University School of Medicine Institutional Review  
4 Board (approved October 3, 2017; #i17-00578). All students in participating schools will be invited to  
5 participate and parents will sign a consent form after reviewing written information about the study.  
6  
7  
8  
9

10 *Consent for publication*

11  
12 All authors consent to publication of this article.  
13  
14  
15

16 *Competing interests*

17  
18 The authors declare they have no competing interests.  
19  
20  
21  
22  
23  
24  
25  
26  
27  
28  
29  
30  
31  
32  
33  
34  
35  
36  
37  
38  
39  
40  
41  
42  
43  
44  
45  
46  
47  
48  
49  
50  
51  
52  
53  
54  
55  
56  
57  
58  
59  
60

1  
2  
3  
4  
5  
6  
7  
8  
9  
10  
11  
12  
13  
14  
15  
16  
17  
18  
19  
20  
21  
22  
23  
24  
25  
26  
27  
28  
29  
30  
31  
32  
33  
34  
35  
36  
37  
38  
39  
40  
41  
42  
43  
44  
45  
46  
47  
48  
49  
50  
51  
52  
53  
54  
55  
56  
57  
58  
59  
60

**Figure Legend**

Figure 1: Schedule of enrolment, interventions, and assessments

For peer review only

## References

1. Marcenes W, Kassebaum NJ, Bernabé E, et al. Global burden of oral conditions in 1990-2010: a systematic analysis. *Journal of dental research*. 2013;92(7):592-597.
2. Kassebaum NJ, Smith AGCB, E., Fleming TDAER, C, et al. Global, Regional, and National Prevalence, Incidence, and Disability-Adjusted Life Years for Oral Conditions for 195 Countries, 1990–2015: A Systematic Analysis for the Global Burden of Diseases, Injuries, and Risk Factors. *Journal of Dental Research*. 2017;96(4):380-387.
3. Robertson D, Smith AJ. The microbiology of the acute dental abscess. *J Med Microbiol*. 2009;58(Pt 2):155-162.
4. Pine CM, Harris RV, Burnside G, Merrett MC. An investigation of the relationship between untreated decayed teeth and dental sepsis in 5-year-old children. *British dental journal*. 2006;200(1):45-47; discussion 29.
5. Cooke B. The prevention of dental caries and oral sepsis. *Probe (Lond)*. 1970;13(3):83 passim.
6. Dye B, Li X, Thornton-Evans G. Oral health disparities as determined by selected Healthy People 2020 Oral Health objectives for the United States, 2009-2010. *NCHS Data Brief*. 2012;104:1-8.
7. Dye BA, Thornton-Evans G, Li X, Iafolla TJ. Dental caries and sealant prevalence in children and adolescents in the United States, 2011-2012. *NCHS data brief*. 2015(191):1-8.
8. Griffin SO, Wei L, Gooch BF, Weno K, Espinoza L. Vital Signs: Dental Sealant Use and Untreated Tooth Decay Among U.S. School-Aged Children. *MMWR Morb Mortal Wkly Rep*. 2016;65(41):1141-1145.
9. Dye BA, Thornton-Evans G. Trends in oral health by poverty status as measured by Healthy People 2010 objectives. *Public health reports (Washington, DC : 1974)*. 2010;125(6):817-830.
10. Dye BA, Li X, Thornton-Evans G. Oral health disparities as determined by selected healthy people 2020 oral health objectives for the United States, 2009-2010. *NCHS data brief*. 2012(104):1-8.
11. Webster AE, ed *Preparation of cavities for fillings*. Philadelphia: P. Blakiston's Son & Co; 1908.
12. Johnson CN, ed. A text-book of operative dentistry.
13. Vujicic M, Nasseh K. A decade in dental care utilization among adults and children (2001-2010). *Health Serv Res*. 2014;49(2):460-480.
14. Griffin SO, Barker LK, Wei L, et al. Use of dental care and effective preventive services in preventing tooth decay among U.S. Children and adolescents--Medical Expenditure Panel Survey, United States, 2003-2009 and National Health and Nutrition Examination Survey, United States, 2005-2010. *Morbidity and mortality weekly report Surveillance summaries*. 2014;63 Suppl 2:54-60.
15. A national call to action to promote oral health. In: U.S. Department of Health and Human Services PHS, Centers for Disease Control and Prevention, and the National Institutes of Health, National Institute of Dental and Craniofacial Research, ed. Rockville, MD: U.S. Department of Health and Human Services; May 2003.
16. Dye BA, Tan S, Smith V, et al. Trends in oral health status: United States, 1988-1994 and 1999-2004. *Vital Health Stat 11*. 2007;11(248):1-92.
17. Dye BA, Thornton-Evans G, Li X, Iafolla TJ. Dental caries and sealant prevalence in children and adolescents in the United States, 2011-2012. *NCHS Data Brief*. 2015;191.
18. Oral Health: efforts under way to improve children's access to dental services, but sustained attention needed to address ongoing concerns. In: Office USGA, ed: United States Government Accountability Office; 2010.
19. IOM. *Initial National Priorities for Comparative Effectiveness Research*. Washington DC: National Academies Press; 2009.



19. Marinho VC, Worthington HV, Walsh T, Clarkson JE. Fluoride varnishes for preventing dental caries in children and adolescents. *Cochrane Database Syst Rev*. 2013(7):CD002279.
20. Ahovuo-Saloranta A, Forss H, Walsh T, et al. Sealants for preventing dental decay in the permanent teeth. *Cochrane Database Syst Rev*. 2013(3):CD001830.
21. Yengopal V, Mickenautsch S, Bezerra AC, Leal SC. Caries-preventive effect of glass ionomer and resin-based fissure sealants on permanent teeth: a meta analysis. *Journal of oral science*. 2009;51(3):373-382.
22. de Amorim RG, Leal SC, Frencken JE. Survival of atraumatic restorative treatment (ART) sealants and restorations: a meta-analysis. *Clinical oral investigations*. 2012;16(2):429-441.
23. Rosenblatt A, Stamford TCM, Niederman R. Silver diamine fluoride: a caries "silver-fluoride bullet". *Journal of dental research*. 2009;88(2):116-125.
24. Zhi QH, Lo ECM, Lin HC. Randomized clinical trial on effectiveness of silver diamine fluoride and glass ionomer in arresting dentine caries in preschool children. *Journal of dentistry*. 2012;40(11):962-967.
25. Broder HL, Wilson-Genderson M. Reliability and convergent and discriminant validity of the Child Oral Health Impact Profile (COHIP Child's version). *Community dentistry and oral epidemiology*. 2007;35 Suppl 1:20-31.
26. Broder HL, Wilson-Genderson M, Sisco L. Reliability and validity testing for the Child Oral Health Impact Profile-Reduced (COHIP-SF 19). *J Public Health Dent*. 2012;72(4):302-312.
27. Diggle PJ, Heagerty P, Kung-Yee L, Zeger SL. *Analysis of Longitudinal Data*. Oxford U.K.: Oxford University Press; 2002.
28. Greene CJ, Morland LA, Durkalski VL, Frueh BC. Noninferiority and equivalence designs: issues and implications for mental health research. *J Trauma Stress*. 2008;21(5):433-439.
29. Sapa S. Semi-parametric mixed effects models for longitudinal data with applications in business and economics. *International Journal of Advanced Statistics and Probability*. 2014;2(2):84.
30. *Improving access to oral health care for vulnerable and underserved populations*. Washington, DC: Institute of Medicine of the National Academies;2011.
31. Gooch BF, Griffin SO, Gray SK, et al. Preventing dental caries through school-based sealant programs: updated recommendations and reviews of evidence. *J Am Dent Assoc*. 2009;140(11):1356-1365.
32. Llodra JC, Rodriguez A, Ferrer B, Menardia V, Ramos T, Morato M. Efficacy of silver diamine fluoride for caries reduction in primary teeth and first permanent molars of schoolchildren: 36-month clinical trial. *Journal of dental research*. 2005;84(8):721-724.
33. Horst JA, Ellenikiotis H, Milgrom PM. UCSF Protocol for Caries Arrest Using Silver Diamine Fluoride: Rationale, Indications, and Consent. *J Calif Dent Assoc*. 2016;44(1).

| TIMEPOINT                      | STUDY PERIOD |         |         |            |         |         |                 |                |                |                |                |                |                |                |                | Close-out |                 |                 |
|--------------------------------|--------------|---------|---------|------------|---------|---------|-----------------|----------------|----------------|----------------|----------------|----------------|----------------|----------------|----------------|-----------|-----------------|-----------------|
|                                | Enrolment    |         |         | Allocation |         |         | Post-allocation |                |                |                |                |                |                |                |                |           |                 |                 |
|                                | Phase 1      | Phase 2 | Phase 3 | Phase 1    | Phase 2 | Phase 3 | t <sub>1</sub>  | t <sub>2</sub> | t <sub>3</sub> | t <sub>4</sub> | t <sub>5</sub> | t <sub>6</sub> | t <sub>7</sub> | t <sub>8</sub> | t <sub>9</sub> |           | t <sub>10</sub> | t <sub>11</sub> |
| <b>ENROLMENT:</b>              |              |         |         |            |         |         |                 |                |                |                |                |                |                |                |                |           |                 |                 |
| Eligibility screen             | X            | X       | X       |            |         |         |                 |                |                |                |                |                |                |                |                |           |                 |                 |
| Informed consent               | X            | X       | X       |            |         |         |                 |                |                |                |                |                |                |                |                |           |                 |                 |
| Allocation                     |              |         |         | X          | X       | X       |                 |                |                |                |                |                |                |                |                |           |                 |                 |
| <b>INTERVENTIONS:</b>          |              |         |         |            |         |         |                 |                |                |                |                |                |                |                |                |           |                 |                 |
| Simple prevention              |              |         |         |            |         |         |                 |                |                |                |                |                |                |                |                |           |                 |                 |
| Complex prevention             |              |         |         |            |         |         |                 |                |                |                |                |                |                |                |                |           |                 |                 |
| <b>ASSESSMENTS:</b>            |              |         |         |            |         |         |                 |                |                |                |                |                |                |                |                |           |                 |                 |
| Baseline examination variables |              |         |         |            |         |         |                 |                |                |                |                |                |                |                |                |           |                 |                 |
| Caries arrest/prevalence       |              |         |         |            |         |         |                 |                |                |                |                |                |                |                |                |           |                 | X               |

97x48mm (300 x 300 DPI)

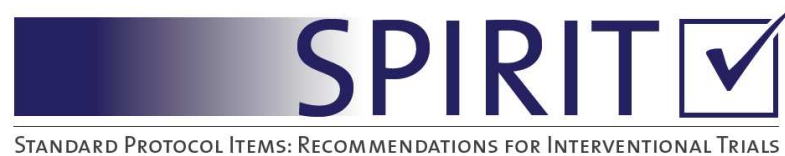

SPIRIT 2013 Checklist: Recommended items to address in a clinical trial protocol and related documents\*

| Section/item                      | Item No | Description                                                                                                                                                                                                                                                                              | Addressed on page number |
|-----------------------------------|---------|------------------------------------------------------------------------------------------------------------------------------------------------------------------------------------------------------------------------------------------------------------------------------------------|--------------------------|
| <b>Administrative information</b> |         |                                                                                                                                                                                                                                                                                          |                          |
| Title                             | 1       | Descriptive title identifying the study design, population, interventions, and, if applicable, trial acronym                                                                                                                                                                             | ___ 1 ___                |
| Trial registration                | 2a      | Trial identifier and registry name. If not yet registered, name of intended registry                                                                                                                                                                                                     | ___ 14 ___               |
|                                   | 2b      | All items from the World Health Organization Trial Registration Data Set                                                                                                                                                                                                                 | ___ 14 ___               |
| Protocol version                  | 3       | Date and version identifier                                                                                                                                                                                                                                                              | ___ 14 ___               |
| Funding                           | 4       | Sources and types of financial, material, and other support                                                                                                                                                                                                                              | ___ 14 ___               |
| Roles and responsibilities        | 5a      | Names, affiliations, and roles of protocol contributors                                                                                                                                                                                                                                  | ___ 14 ___               |
|                                   | 5b      | Name and contact information for the trial sponsor                                                                                                                                                                                                                                       | ___ 1 ___                |
|                                   | 5c      | Role of study sponsor and funders, if any, in study design; collection, management, analysis, and interpretation of data; writing of the report; and the decision to submit the report for publication, including whether they will have ultimate authority over any of these activities | ___ 14 ___               |
|                                   | 5d      | Composition, roles, and responsibilities of the coordinating centre, steering committee, endpoint adjudication committee, data management team, and other individuals or groups overseeing the trial, if applicable (see Item 21a for data monitoring committee)                         | ___ N/A ___              |

## Introduction

|                          |    |                                                                                                                                                                                                           |     |
|--------------------------|----|-----------------------------------------------------------------------------------------------------------------------------------------------------------------------------------------------------------|-----|
| Background and rationale | 6a | Description of research question and justification for undertaking the trial, including summary of relevant studies (published and unpublished) examining benefits and harms for each intervention        | 4-5 |
|                          | 6b | Explanation for choice of comparators                                                                                                                                                                     | 4   |
| Objectives               | 7  | Specific objectives or hypotheses                                                                                                                                                                         | 4-5 |
| Trial design             | 8  | Description of trial design including type of trial (eg, parallel group, crossover, factorial, single group), allocation ratio, and framework (eg, superiority, equivalence, noninferiority, exploratory) | 5   |

## Methods: Participants, interventions, and outcomes

|                      |     |                                                                                                                                                                                                                                                                                                                                                                                |       |
|----------------------|-----|--------------------------------------------------------------------------------------------------------------------------------------------------------------------------------------------------------------------------------------------------------------------------------------------------------------------------------------------------------------------------------|-------|
| Study setting        | 9   | Description of study settings (eg, community clinic, academic hospital) and list of countries where data will be collected. Reference to where list of study sites can be obtained                                                                                                                                                                                             | 6     |
| Eligibility criteria | 10  | Inclusion and exclusion criteria for participants. If applicable, eligibility criteria for study centres and individuals who will perform the interventions (eg, surgeons, psychotherapists)                                                                                                                                                                                   | 8     |
| Interventions        | 11a | Interventions for each group with sufficient detail to allow replication, including how and when they will be administered                                                                                                                                                                                                                                                     | 6-7   |
|                      | 11b | Criteria for discontinuing or modifying allocated interventions for a given trial participant (eg, drug dose change in response to harms, participant request, or improving/worsening disease)                                                                                                                                                                                 | NA    |
|                      | 11c | Strategies to improve adherence to intervention protocols, and any procedures for monitoring adherence (eg, drug tablet return, laboratory tests)                                                                                                                                                                                                                              | NA    |
|                      | 11d | Relevant concomitant care and interventions that are permitted or prohibited during the trial                                                                                                                                                                                                                                                                                  | NA    |
| Outcomes             | 12  | Primary, secondary, and other outcomes, including the specific measurement variable (eg, systolic blood pressure), analysis metric (eg, change from baseline, final value, time to event), method of aggregation (eg, median, proportion), and time point for each outcome. Explanation of the clinical relevance of chosen efficacy and harm outcomes is strongly recommended | 8     |
| Participant timeline | 13  | Time schedule of enrolment, interventions (including any run-ins and washouts), assessments, and visits for participants. A schematic diagram is highly recommended (see Figure)                                                                                                                                                                                               | Fig_1 |

1  
2  
3 Sample size 14 Estimated number of participants needed to achieve study objectives and how it was determined, including \_\_\_\_\_10\_\_\_\_\_  
4 clinical and statistical assumptions supporting any sample size calculations

5  
6 Recruitment 15 Strategies for achieving adequate participant enrolment to reach target sample size \_\_\_\_\_9\_\_\_\_\_  
7

8 **Methods: Assignment of interventions (for controlled trials)**  
9

10 Allocation:

11  
12 Sequence generation 16a Method of generating the allocation sequence (eg, computer-generated random numbers), and list of any \_\_\_\_\_8\_\_\_\_\_  
13 factors for stratification. To reduce predictability of a random sequence, details of any planned restriction  
14 (eg, blocking) should be provided in a separate document that is unavailable to those who enrol participants  
15 or assign interventions  
16

17 Allocation concealment mechanism 16b Mechanism of implementing the allocation sequence (eg, central telephone; sequentially numbered, \_\_\_\_\_NA\_\_\_\_\_  
18 opaque, sealed envelopes), describing any steps to conceal the sequence until interventions are assigned  
19  
20

21 Implementation 16c Who will generate the allocation sequence, who will enrol participants, and who will assign participants to \_\_\_\_\_8\_\_\_\_\_  
22 interventions  
23

24 Blinding (masking) 17a Who will be blinded after assignment to interventions (eg, trial participants, care providers, outcome \_\_\_\_\_9\_\_\_\_\_  
25 assessors, data analysts), and how  
26

27 17b If blinded, circumstances under which unblinding is permissible, and procedure for revealing a participant's \_\_\_\_\_9\_\_\_\_\_  
28 allocated intervention during the trial  
29  
30

31 **Methods: Data collection, management, and analysis**  
32

33 Data collection methods 18a Plans for assessment and collection of outcome, baseline, and other trial data, including any related \_\_\_\_\_9\_\_\_\_\_  
34 processes to promote data quality (eg, duplicate measurements, training of assessors) and a description of  
35 study instruments (eg, questionnaires, laboratory tests) along with their reliability and validity, if known.  
36 Reference to where data collection forms can be found, if not in the protocol  
37

38 18b Plans to promote participant retention and complete follow-up, including list of any outcome data to be \_\_\_\_\_NA\_\_\_\_\_  
39 collected for participants who discontinue or deviate from intervention protocols  
40  
41  
42  
43  
44

|    |                                 |     |                                                                                                                                                                                                                                                                                                                                       |                 |
|----|---------------------------------|-----|---------------------------------------------------------------------------------------------------------------------------------------------------------------------------------------------------------------------------------------------------------------------------------------------------------------------------------------|-----------------|
| 1  |                                 |     |                                                                                                                                                                                                                                                                                                                                       |                 |
| 2  |                                 |     |                                                                                                                                                                                                                                                                                                                                       |                 |
| 3  | Data management                 | 19  | Plans for data entry, coding, security, and storage, including any related processes to promote data quality (eg, double data entry; range checks for data values). Reference to where details of data management procedures can be found, if not in the protocol                                                                     | _____9_____     |
| 4  |                                 |     |                                                                                                                                                                                                                                                                                                                                       |                 |
| 5  |                                 |     |                                                                                                                                                                                                                                                                                                                                       |                 |
| 6  |                                 |     |                                                                                                                                                                                                                                                                                                                                       |                 |
| 7  | Statistical methods             | 20a | Statistical methods for analysing primary and secondary outcomes. Reference to where other details of the statistical analysis plan can be found, if not in the protocol                                                                                                                                                              | _____10-12_____ |
| 8  |                                 |     |                                                                                                                                                                                                                                                                                                                                       |                 |
| 9  |                                 |     |                                                                                                                                                                                                                                                                                                                                       |                 |
| 10 |                                 | 20b | Methods for any additional analyses (eg, subgroup and adjusted analyses)                                                                                                                                                                                                                                                              | _____12_____    |
| 11 |                                 |     |                                                                                                                                                                                                                                                                                                                                       |                 |
| 12 |                                 | 20c | Definition of analysis population relating to protocol non-adherence (eg, as randomised analysis), and any statistical methods to handle missing data (eg, multiple imputation)                                                                                                                                                       | _____12_____    |
| 13 |                                 |     |                                                                                                                                                                                                                                                                                                                                       |                 |
| 14 |                                 |     |                                                                                                                                                                                                                                                                                                                                       |                 |
| 15 | <b>Methods: Monitoring</b>      |     |                                                                                                                                                                                                                                                                                                                                       |                 |
| 16 |                                 |     |                                                                                                                                                                                                                                                                                                                                       |                 |
| 17 | Data monitoring                 | 21a | Composition of data monitoring committee (DMC); summary of its role and reporting structure; statement of whether it is independent from the sponsor and competing interests; and reference to where further details about its charter can be found, if not in the protocol. Alternatively, an explanation of why a DMC is not needed | _____NA_____    |
| 18 |                                 |     |                                                                                                                                                                                                                                                                                                                                       |                 |
| 19 |                                 |     |                                                                                                                                                                                                                                                                                                                                       |                 |
| 20 |                                 |     |                                                                                                                                                                                                                                                                                                                                       |                 |
| 21 |                                 |     |                                                                                                                                                                                                                                                                                                                                       |                 |
| 22 |                                 | 21b | Description of any interim analyses and stopping guidelines, including who will have access to these interim results and make the final decision to terminate the trial                                                                                                                                                               | _____NA_____    |
| 23 |                                 |     |                                                                                                                                                                                                                                                                                                                                       |                 |
| 24 |                                 |     |                                                                                                                                                                                                                                                                                                                                       |                 |
| 25 | Harms                           | 22  | Plans for collecting, assessing, reporting, and managing solicited and spontaneously reported adverse events and other unintended effects of trial interventions or trial conduct                                                                                                                                                     | _____7_____     |
| 26 |                                 |     |                                                                                                                                                                                                                                                                                                                                       |                 |
| 27 |                                 |     |                                                                                                                                                                                                                                                                                                                                       |                 |
| 28 | Auditing                        | 23  | Frequency and procedures for auditing trial conduct, if any, and whether the process will be independent from investigators and the sponsor                                                                                                                                                                                           | _____6_____     |
| 29 |                                 |     |                                                                                                                                                                                                                                                                                                                                       |                 |
| 30 |                                 |     |                                                                                                                                                                                                                                                                                                                                       |                 |
| 31 |                                 |     |                                                                                                                                                                                                                                                                                                                                       |                 |
| 32 | <b>Ethics and dissemination</b> |     |                                                                                                                                                                                                                                                                                                                                       |                 |
| 33 |                                 |     |                                                                                                                                                                                                                                                                                                                                       |                 |
| 34 | Research ethics approval        | 24  | Plans for seeking research ethics committee/institutional review board (REC/IRB) approval                                                                                                                                                                                                                                             | 6 (approved)    |
| 35 |                                 |     |                                                                                                                                                                                                                                                                                                                                       |                 |
| 36 |                                 |     |                                                                                                                                                                                                                                                                                                                                       |                 |
| 37 | Protocol amendments             | 25  | Plans for communicating important protocol modifications (eg, changes to eligibility criteria, outcomes, analyses) to relevant parties (eg, investigators, REC/IRBs, trial participants, trial registries, journals, regulators)                                                                                                      | _____6_____     |
| 38 |                                 |     |                                                                                                                                                                                                                                                                                                                                       |                 |
| 39 |                                 |     |                                                                                                                                                                                                                                                                                                                                       |                 |
| 40 |                                 |     |                                                                                                                                                                                                                                                                                                                                       |                 |
| 41 |                                 |     |                                                                                                                                                                                                                                                                                                                                       |                 |
| 42 |                                 |     |                                                                                                                                                                                                                                                                                                                                       |                 |
| 43 |                                 |     |                                                                                                                                                                                                                                                                                                                                       |                 |
| 44 |                                 |     |                                                                                                                                                                                                                                                                                                                                       |                 |
| 45 |                                 |     |                                                                                                                                                                                                                                                                                                                                       |                 |
| 46 |                                 |     |                                                                                                                                                                                                                                                                                                                                       |                 |
| 47 |                                 |     |                                                                                                                                                                                                                                                                                                                                       |                 |



1  
2  
3  
4  
5  
6  
7  
8  
9  
10  
11  
12  
13  
14  
15  
16  
17  
18  
19  
20  
21  
22  
23  
24  
25  
26  
27  
28  
29  
30  
31  
32  
33  
34  
35  
36  
37  
38  
39  
40  
41  
42  
43  
44  
45  
46  
47

|                               |     |                                                                                                                                                                                                                                                                                     |             |
|-------------------------------|-----|-------------------------------------------------------------------------------------------------------------------------------------------------------------------------------------------------------------------------------------------------------------------------------------|-------------|
| Consent or assent             | 26a | Who will obtain informed consent or assent from potential trial participants or authorised surrogates, and how (see Item 32)                                                                                                                                                        | 9           |
|                               | 26b | Additional consent provisions for collection and use of participant data and biological specimens in ancillary studies, if applicable                                                                                                                                               | NA          |
| Confidentiality               | 27  | How personal information about potential and enrolled participants will be collected, shared, and maintained in order to protect confidentiality before, during, and after the trial                                                                                                | 9-10        |
| Declaration of interests      | 28  | Financial and other competing interests for principal investigators for the overall trial and each study site                                                                                                                                                                       | 15          |
| Access to data                | 29  | Statement of who will have access to the final trial dataset, and disclosure of contractual agreements that limit such access for investigators                                                                                                                                     | 14          |
| Ancillary and post-trial care | 30  | Provisions, if any, for ancillary and post-trial care, and for compensation to those who suffer harm from trial participation                                                                                                                                                       | NA          |
| Dissemination policy          | 31a | Plans for investigators and sponsor to communicate trial results to participants, healthcare professionals, the public, and other relevant groups (eg, via publication, reporting in results databases, or other data sharing arrangements), including any publication restrictions | 14          |
|                               | 31b | Authorship eligibility guidelines and any intended use of professional writers                                                                                                                                                                                                      | NA          |
|                               | 31c | Plans, if any, for granting public access to the full protocol, participant-level dataset, and statistical code                                                                                                                                                                     | NA          |
| <b>Appendices</b>             |     |                                                                                                                                                                                                                                                                                     |             |
| Informed consent materials    | 32  | Model consent form and other related documentation given to participants and authorised surrogates                                                                                                                                                                                  | Supp. Files |
| Biological specimens          | 33  | Plans for collection, laboratory evaluation, and storage of biological specimens for genetic or molecular analysis in the current trial and for future use in ancillary studies, if applicable                                                                                      | NA          |

---

\*It is strongly recommended that this checklist be read in conjunction with the SPIRIT 2013 Explanation & Elaboration for important clarification on the items. Amendments to the protocol should be tracked and dated. The SPIRIT checklist is copyrighted by the SPIRIT Group under the Creative Commons "[Attribution-NonCommercial-NoDerivs 3.0 Unported](https://creativecommons.org/licenses/by-nc-nd/3.0/)" license.



## CONSORT 2010 checklist of information to include when reporting a randomised trial\*

| Section/Topic                    | Item No | Checklist item                                                                                                                                                                              | Reported on page No |
|----------------------------------|---------|---------------------------------------------------------------------------------------------------------------------------------------------------------------------------------------------|---------------------|
| <b>Title and abstract</b>        |         |                                                                                                                                                                                             |                     |
|                                  | 1a      | Identification as a randomised trial in the title                                                                                                                                           | 1                   |
|                                  | 1b      | Structured summary of trial design, methods, results, and conclusions (for specific guidance see CONSORT for abstracts)                                                                     | 2                   |
| <b>Introduction</b>              |         |                                                                                                                                                                                             |                     |
| Background and objectives        | 2a      | Scientific background and explanation of rationale                                                                                                                                          | 3-4                 |
|                                  | 2b      | Specific objectives or hypotheses                                                                                                                                                           | 4-5                 |
| <b>Methods</b>                   |         |                                                                                                                                                                                             |                     |
| Trial design                     | 3a      | Description of trial design (such as parallel, factorial) including allocation ratio                                                                                                        | 6                   |
|                                  | 3b      | Important changes to methods after trial commencement (such as eligibility criteria), with reasons                                                                                          | NA                  |
| Participants                     | 4a      | Eligibility criteria for participants                                                                                                                                                       | 8                   |
|                                  | 4b      | Settings and locations where the data were collected                                                                                                                                        | 6                   |
| Interventions                    | 5       | The interventions for each group with sufficient details to allow replication, including how and when they were actually administered                                                       | 6-7                 |
| Outcomes                         | 6a      | Completely defined pre-specified primary and secondary outcome measures, including how and when they were assessed                                                                          | 8                   |
|                                  | 6b      | Any changes to trial outcomes after the trial commenced, with reasons                                                                                                                       | NA                  |
| Sample size                      | 7a      | How sample size was determined                                                                                                                                                              | 10                  |
|                                  | 7b      | When applicable, explanation of any interim analyses and stopping guidelines                                                                                                                | NA                  |
| <b>Randomisation:</b>            |         |                                                                                                                                                                                             |                     |
| Sequence generation              | 8a      | Method used to generate the random allocation sequence                                                                                                                                      | 8                   |
|                                  | 8b      | Type of randomisation; details of any restriction (such as blocking and block size)                                                                                                         | 8                   |
| Allocation concealment mechanism | 9       | Mechanism used to implement the random allocation sequence (such as sequentially numbered containers), describing any steps taken to conceal the sequence until interventions were assigned | 8                   |
| Implementation                   | 10      | Who generated the random allocation sequence, who enrolled participants, and who assigned participants to interventions                                                                     | 8                   |
| Blinding                         | 11a     | If done, who was blinded after assignment to interventions (for example, participants, care providers, those                                                                                | 9                   |



|    |                          |                                                                                                                     |       |
|----|--------------------------|---------------------------------------------------------------------------------------------------------------------|-------|
| 1  |                          |                                                                                                                     |       |
| 2  |                          | assessing outcomes) and how                                                                                         |       |
| 3  |                          |                                                                                                                     |       |
| 4  |                          | 11b If relevant, description of the similarity of interventions                                                     | NA    |
| 5  | Statistical methods      | 12a Statistical methods used to compare groups for primary and secondary outcomes                                   | 10-12 |
| 6  |                          | 12b Methods for additional analyses, such as subgroup analyses and adjusted analyses                                | 10-12 |
| 7  |                          |                                                                                                                     |       |
| 8  | <b>Results</b>           |                                                                                                                     |       |
| 9  | Participant flow (a      | 13a For each group, the numbers of participants who were randomly assigned, received intended treatment, and        |       |
| 10 | diagram is strongly      | were analysed for the primary outcome                                                                               | TBD   |
| 11 | recommended)             | 13b For each group, losses and exclusions after randomisation, together with reasons                                | TBD   |
| 12 | Recruitment              | 14a Dates defining the periods of recruitment and follow-up                                                         | TBD   |
| 13 |                          | 14b Why the trial ended or was stopped                                                                              | TBD   |
| 14 | Baseline data            | 15 A table showing baseline demographic and clinical characteristics for each group                                 | TBD   |
| 15 | Numbers analysed         | 16 For each group, number of participants (denominator) included in each analysis and whether the analysis was      |       |
| 16 |                          | by original assigned groups                                                                                         | TBD   |
| 17 |                          |                                                                                                                     |       |
| 18 | Outcomes and             | 17a For each primary and secondary outcome, results for each group, and the estimated effect size and its           |       |
| 19 | estimation               | precision (such as 95% confidence interval)                                                                         | TBD   |
| 20 |                          | 17b For binary outcomes, presentation of both absolute and relative effect sizes is recommended                     | TBD   |
| 21 | Ancillary analyses       | 18 Results of any other analyses performed, including subgroup analyses and adjusted analyses, distinguishing       |       |
| 22 |                          | pre-specified from exploratory                                                                                      | TBD   |
| 23 |                          |                                                                                                                     |       |
| 24 | Harms                    | 19 All important harms or unintended effects in each group (for specific guidance see CONSORT for harms)            | TBD   |
| 25 |                          |                                                                                                                     |       |
| 26 | <b>Discussion</b>        |                                                                                                                     |       |
| 27 | Limitations              | 20 Trial limitations, addressing sources of potential bias, imprecision, and, if relevant, multiplicity of analyses | TBD   |
| 28 | Generalisability         | 21 Generalisability (external validity, applicability) of the trial findings                                        | TBD   |
| 29 | Interpretation           | 22 Interpretation consistent with results, balancing benefits and harms, and considering other relevant evidence    | TBD   |
| 30 |                          |                                                                                                                     |       |
| 31 | <b>Other information</b> |                                                                                                                     |       |
| 32 | Registration             | 23 Registration number and name of trial registry                                                                   | 14    |
| 33 | Protocol                 | 24 Where the full trial protocol can be accessed, if available                                                      | 14    |
| 34 | Funding                  | 25 Sources of funding and other support (such as supply of drugs), role of funders                                  | 14    |
| 35 |                          |                                                                                                                     |       |

37 \*We strongly recommend reading this statement in conjunction with the CONSORT 2010 Explanation and Elaboration for important clarifications on all the items. If relevant, we also  
 38 recommend reading CONSORT extensions for cluster randomised trials, non-inferiority and equivalence trials, non-pharmacological treatments, herbal interventions, and pragmatic trials.  
 39 Additional extensions are forthcoming: for those and for up to date references relevant to this checklist, see [www.consort-statement.org](http://www.consort-statement.org).
