# Supplementary material for: Comparative effectiveness of treatments to prevent dental caries given to rural children in school-based settings: protocol for a cluster randomised controlled trial
Source: PubMed Central journal article supplement — BMJ Open. 2018 Apr 13;8(4):e022646. doi: 10.1136/bmjopen-2018-022646 (PMC5905731; doi:10.1136/bmjopen-2018-022646), 2018-04-13
Supplement: bmjopen-2018-022646.reviewer_comments.pdf [file bmjopen-2018-022646.reviewer_comments.pdf]

## PEER REVIEW HISTORY

BMJ Open publishes all reviews undertaken for accepted manuscripts. Reviewers are asked to complete a checklist review form (<http://bmjopen.bmj.com/site/about/resources/checklist.pdf>) and are provided with free text boxes to elaborate on their assessment. These free text comments are reproduced below.

## ARTICLE DETAILS

|                            |                                                                                                                                                                       |
|----------------------------|-----------------------------------------------------------------------------------------------------------------------------------------------------------------------|
| <b>TITLE (PROVISIONAL)</b> | Comparative effectiveness of treatments to prevent dental caries given to rural children in school-based settings: protocol for a cluster randomized controlled trial |
| <b>AUTHORS</b>             | Ruff, Ryan; Niederman, Richard                                                                                                                                        |

This article was not externally reviewed at BMJ Open. Protocols that have been independently assessed prior to submission to BMJ Open are usually fast-tracked to publication on the grounds that further substantial changes will not be possible. This independent assessment will usually be external, independent review for both a substantial grant award from a non-commercial or government funder and ethics approval.
